# Supplementary material for: Total synthesis of four stereoisomers of methyl 4,8,12-trimethylpentadecanoate, a major component of the sex pheromone of the stink bug Edessa meditabunda
Source: Royal Society of Chemistry journal article supplement (doi:10.1039/d0ob00862a), 2020-01-01

## ***Supporting information for***

**Total synthesis of four stereoisomers of methyl 4,8,12-trimethylpentadecanoate, major component of the sex pheromone of the stink bug *Edessa meditabunda*.**

Daiane Szczerbowski<sup>a,b</sup>, Stefan Schulz<sup>b</sup> and Paulo Henrique Gorgatti Zarbin<sup>a,\*</sup>

<sup>a</sup> Laboratório de Semioquímicos, Chemistry Department, Federal University of Paraná, 81531-990 Curitiba, Brazil

<sup>b</sup> Institute of Organic Chemistry, Technische Universität Braunschweig, 38106 Braunschweig, Germany

[\\*pzarbin@ufpr.br](mailto:pzarbin@ufpr.br)

**Copy of NMR, IR and mass spectra of selected stereoisomers.**

$^1\text{H}$  NMR (300 MHz,  $\text{CDCl}_3$ ) of compound (*R*)-4

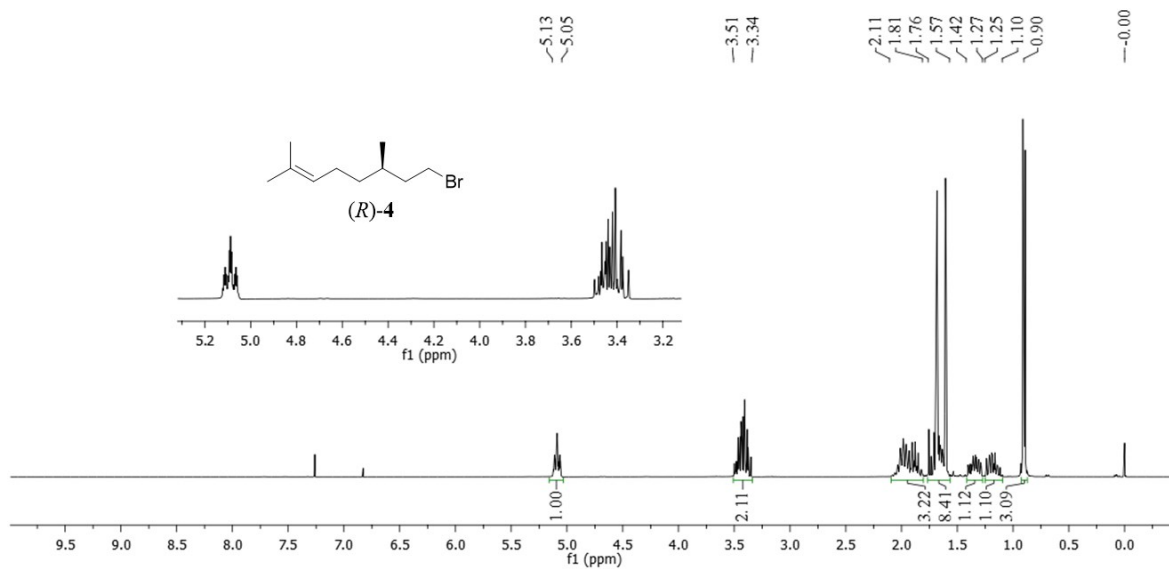

$^{13}\text{C}$  NMR (75 MHz,  $\text{CDCl}_3$ ) and DEPT 135 (superior) of compound (*R*)-4

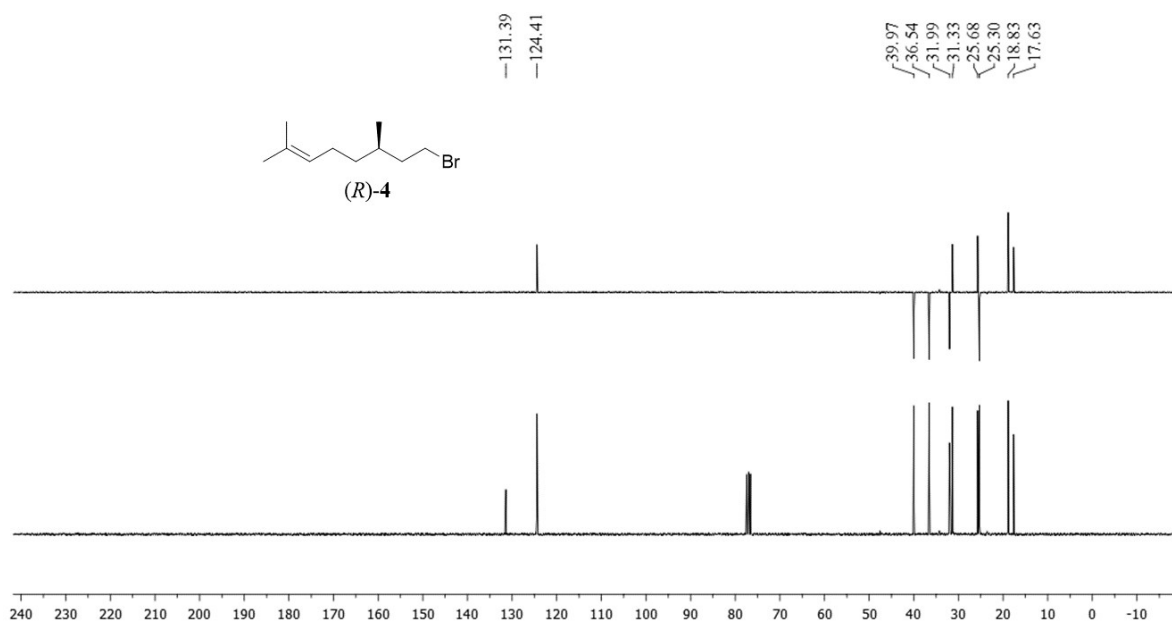

Mass spectrum (EI, 70 eV) of compound (R)-4

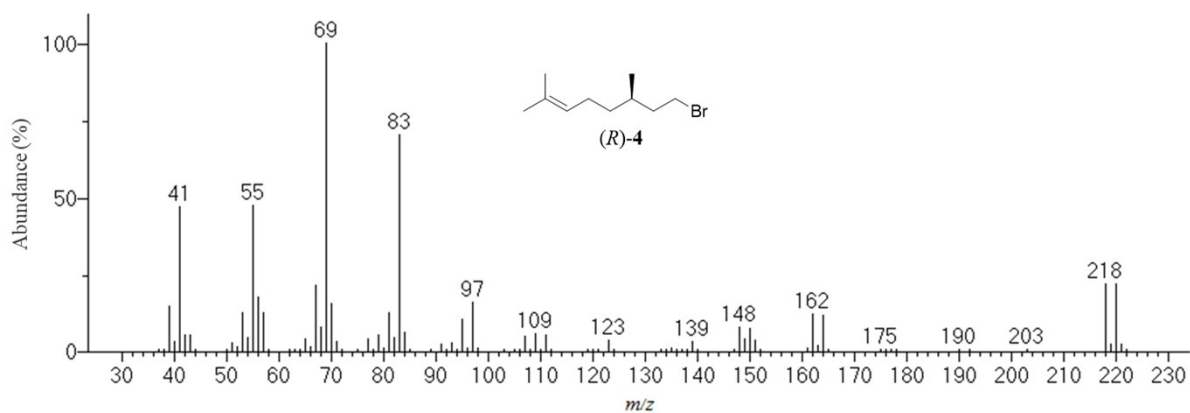

Infrared spectrum of compound (R)-4

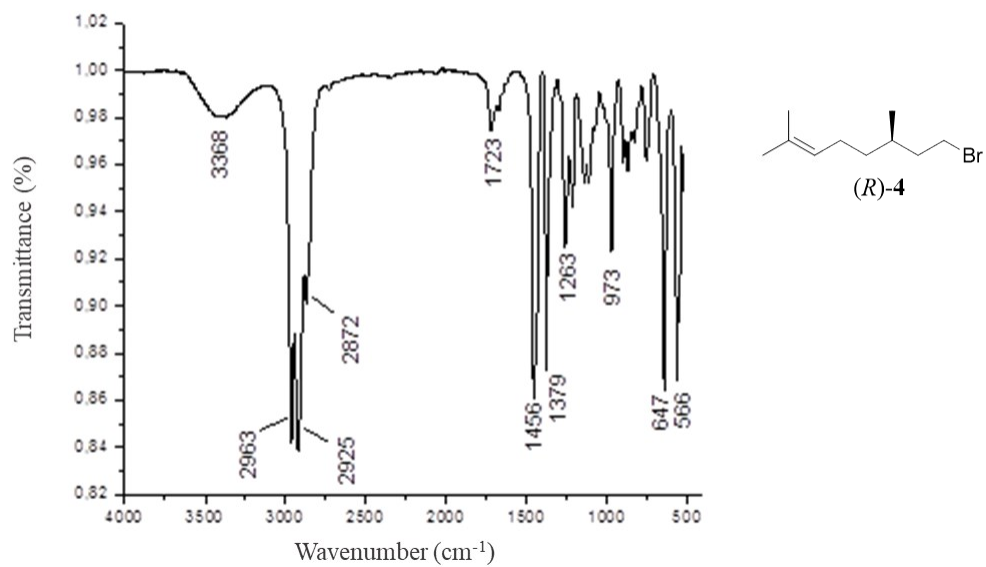

$^1\text{H}$  NMR (300 MHz,  $\text{CDCl}_3$ ) of compound (*R*)-**5**

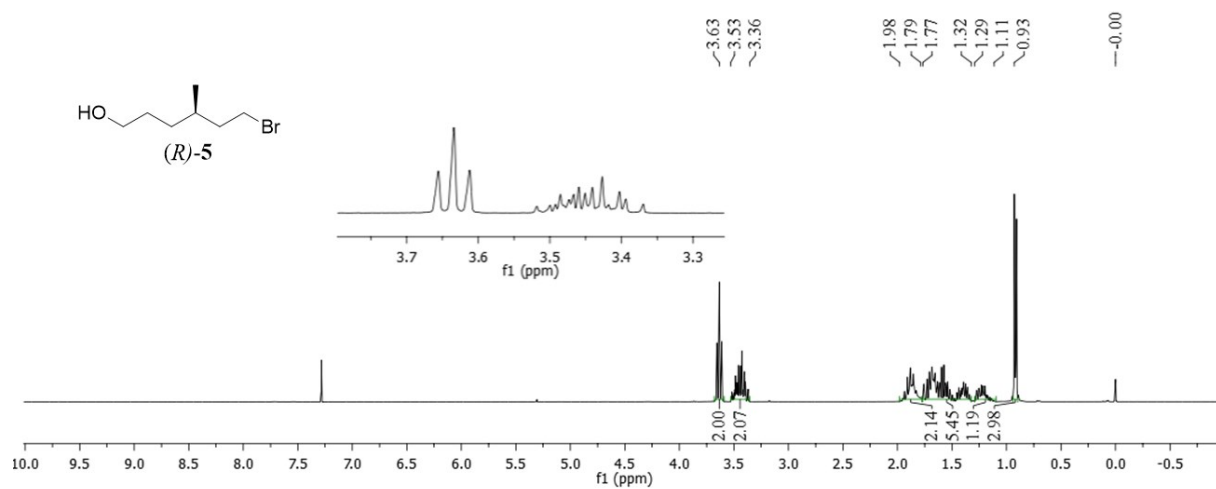

$^{13}\text{C}$  NMR (75 MHz,  $\text{CDCl}_3$ ) and DEPT 135 (superior) of compound (*R*)-**5**

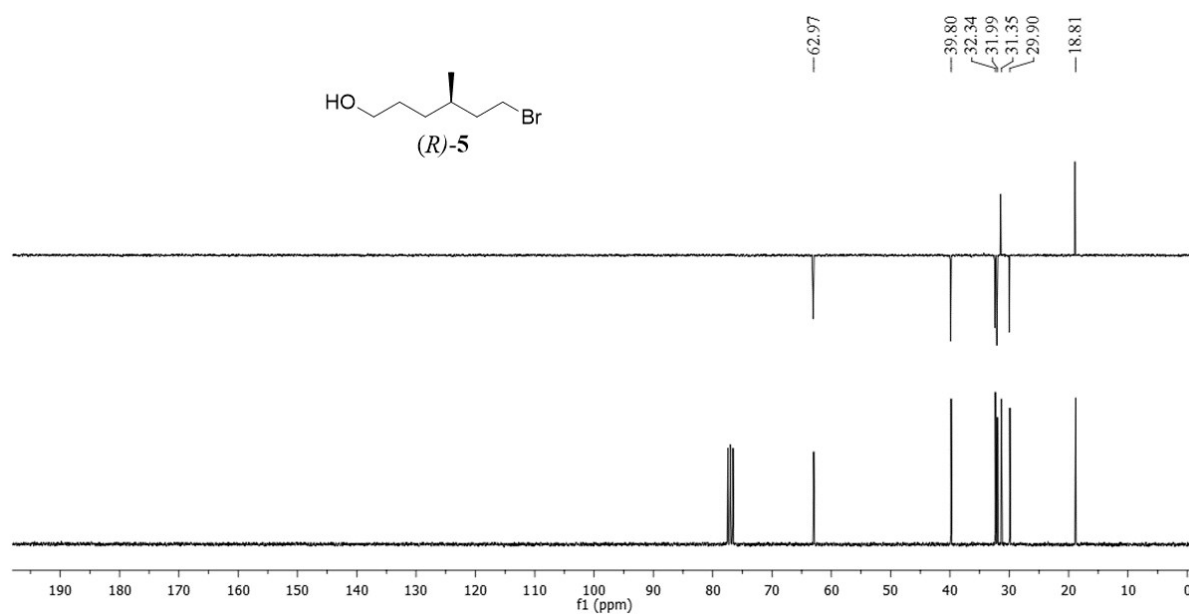

Mass spectrum (EI, 70 eV) of compound (*R*)-**5**

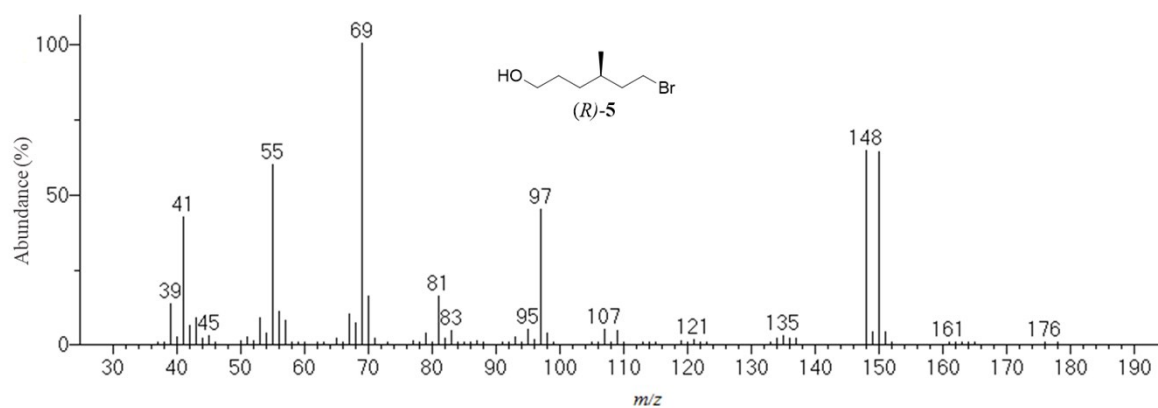

Infrared spectrum of compound (*R*)-**5**

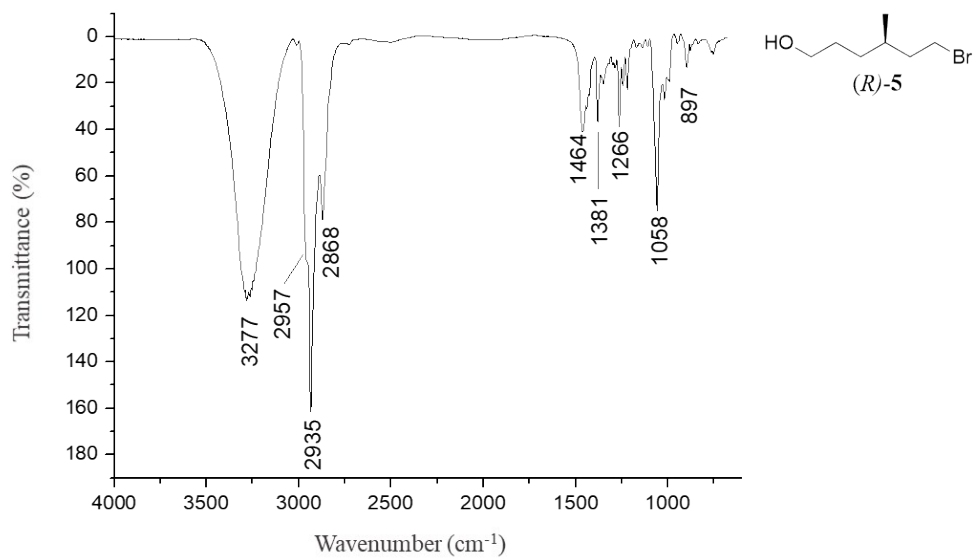

$^1\text{H}$  NMR (300 MHz,  $\text{CDCl}_3$ ) of compound (*R*)-**6**

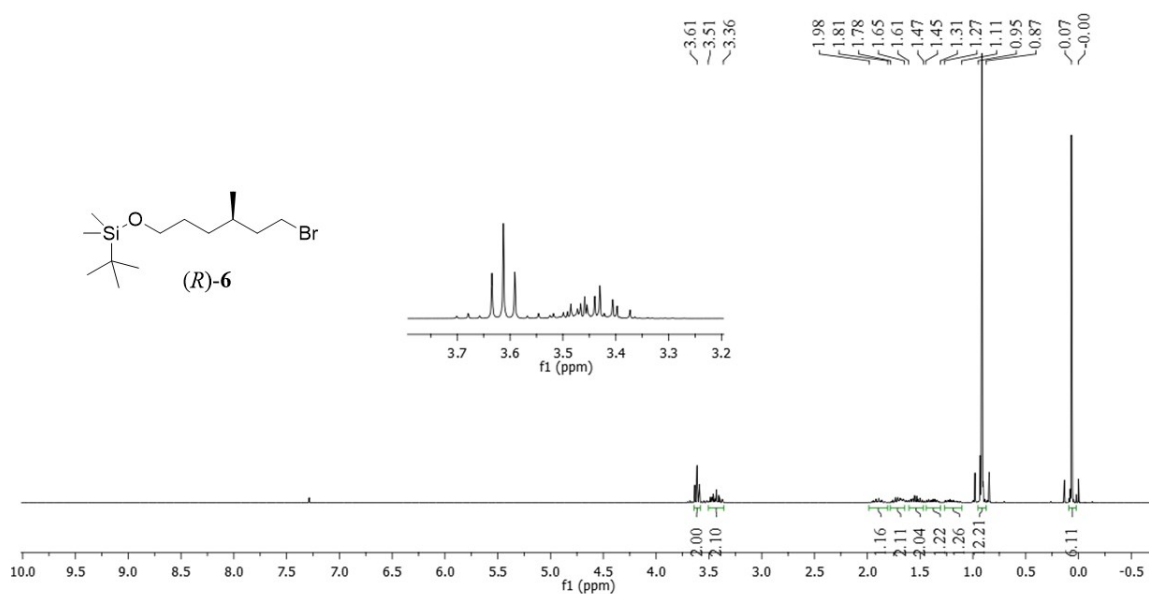

$^{13}\text{C}$  NMR (75 MHz,  $\text{CDCl}_3$ ) e DEPT 135 (superior) of compound (*R*)-**6**

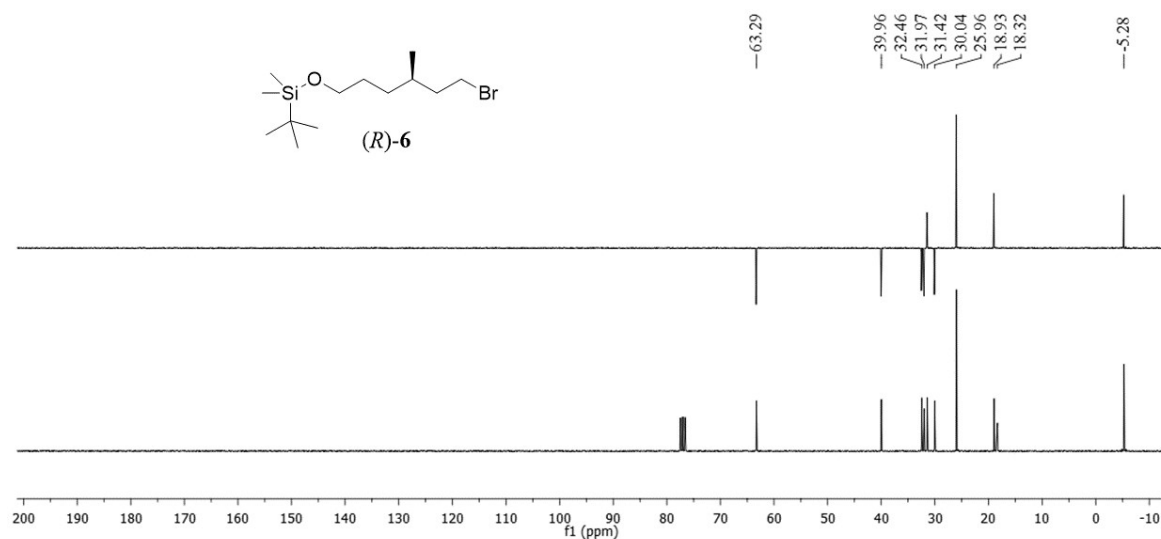

Mass spectrum (EI, 70 eV) of compound (*R*)-6

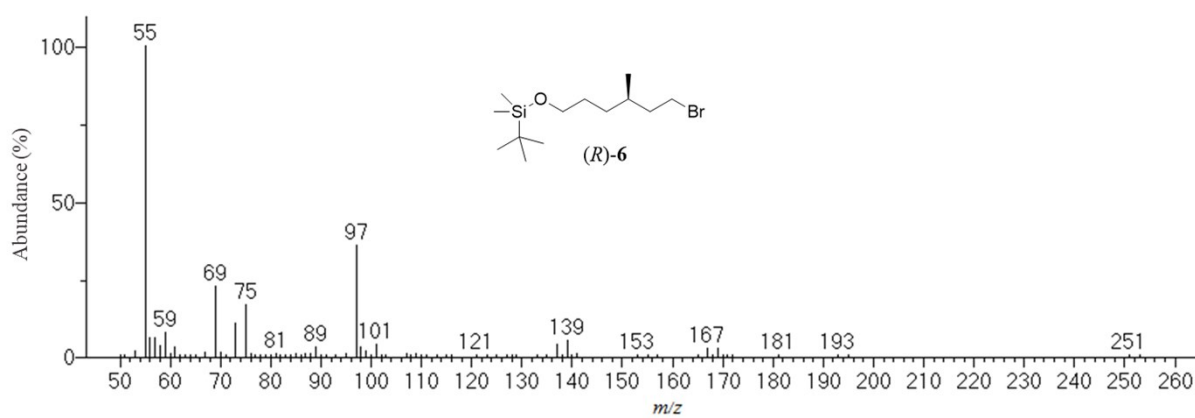

Infrared spectrum of compound (*R*)-6

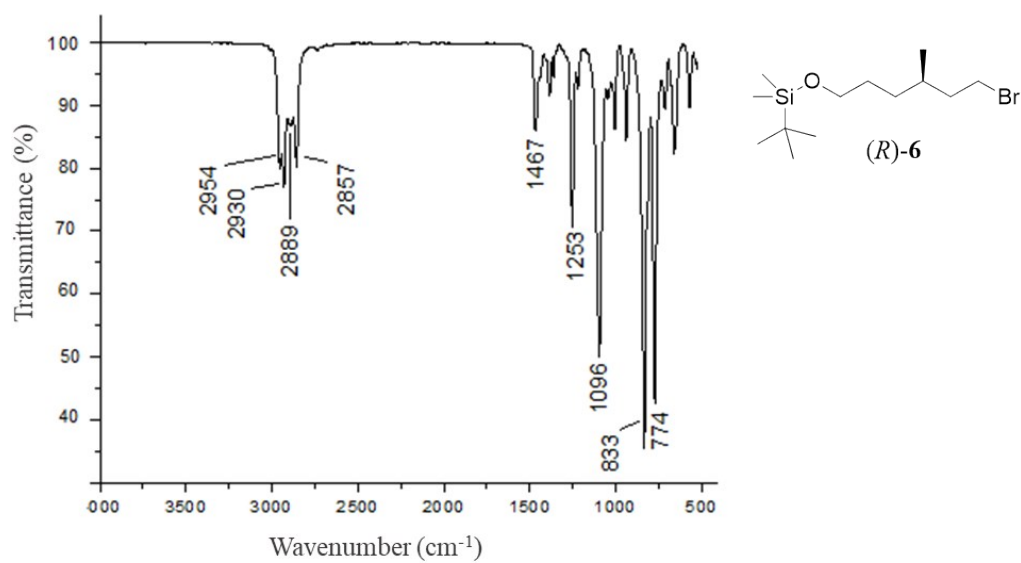

$^1\text{H}$  NMR (200 MHz,  $\text{CDCl}_3$ ) of compound (*S*)-7

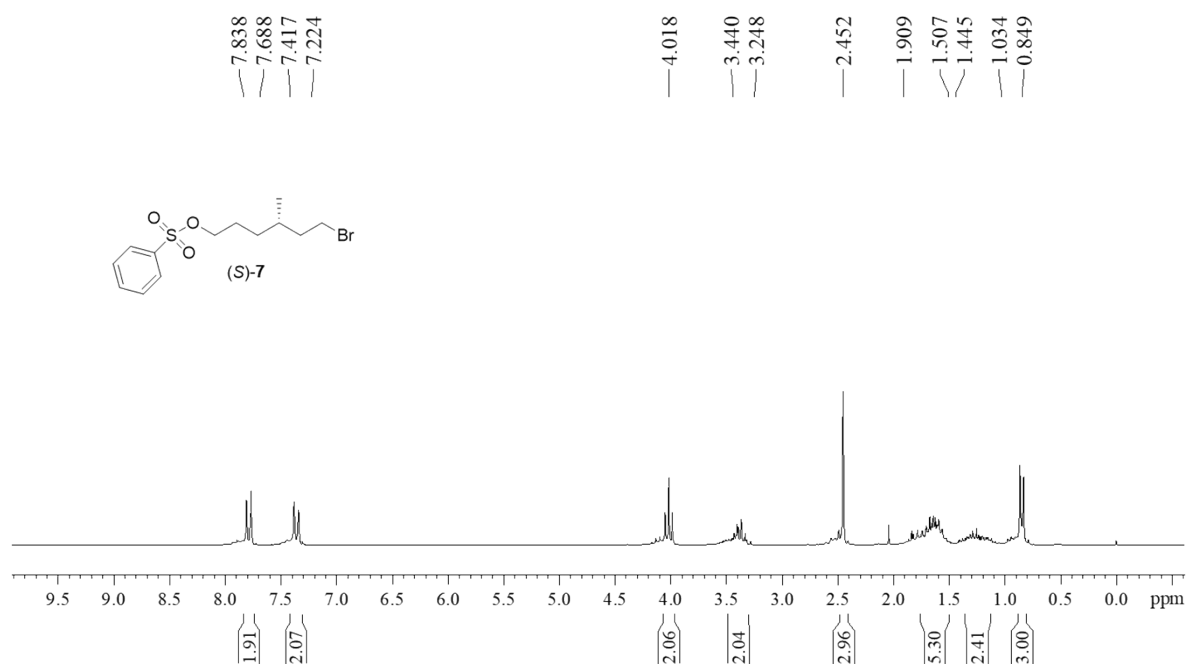

$^{13}\text{C}$  NMR (50 MHz,  $\text{CDCl}_3$ ) of compound (*S*)-7

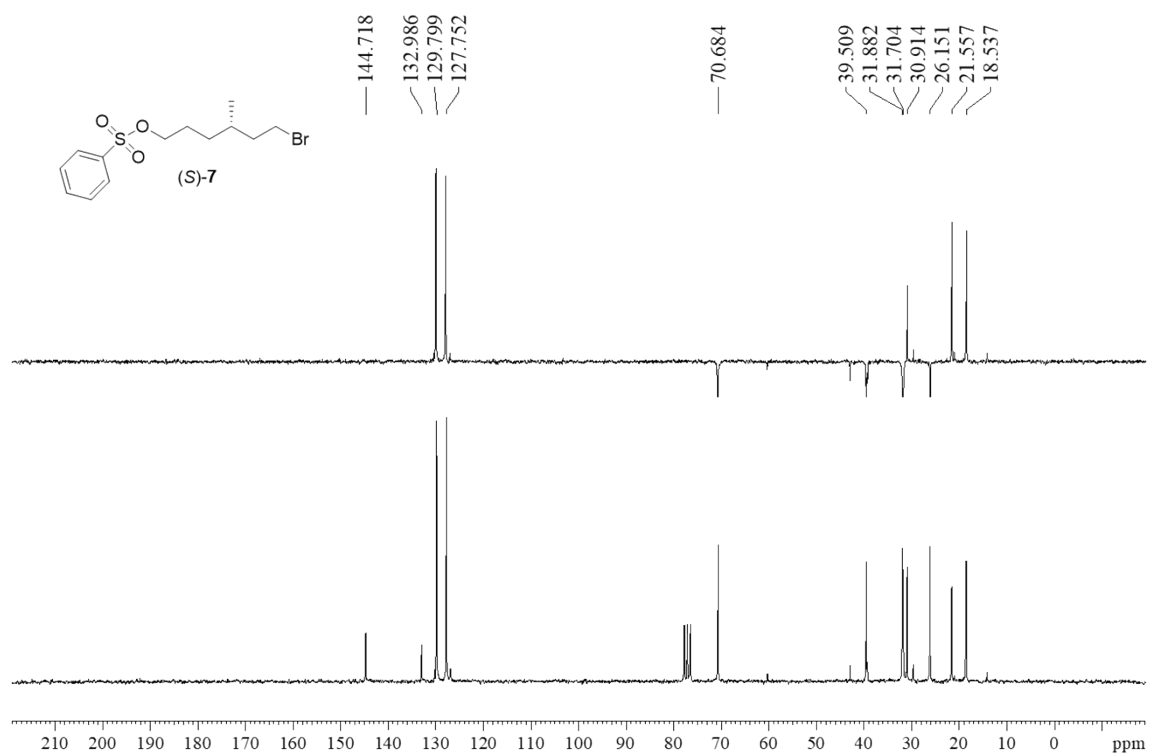



Mass spectrum (EI, 70 eV) of compound (S)-7

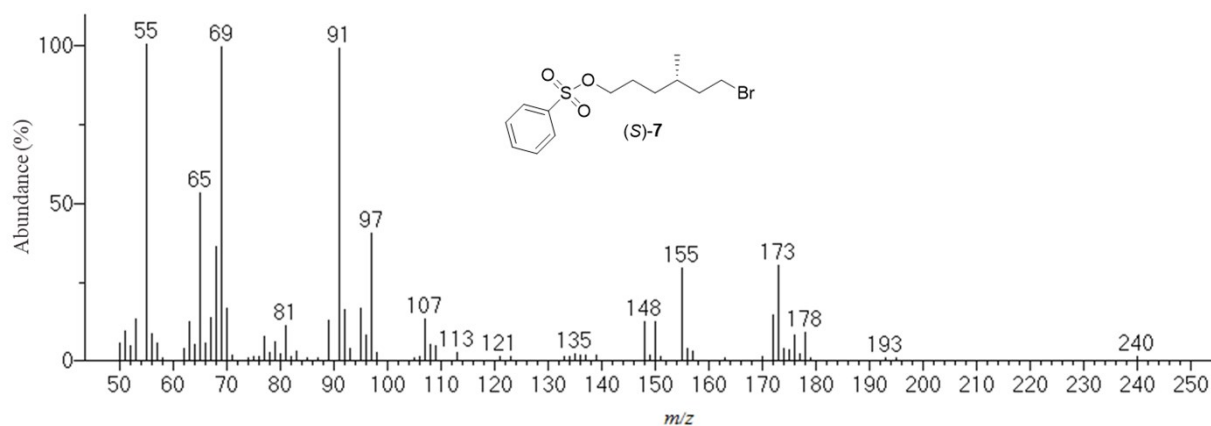

Infrared spectrum of compound (S)-7

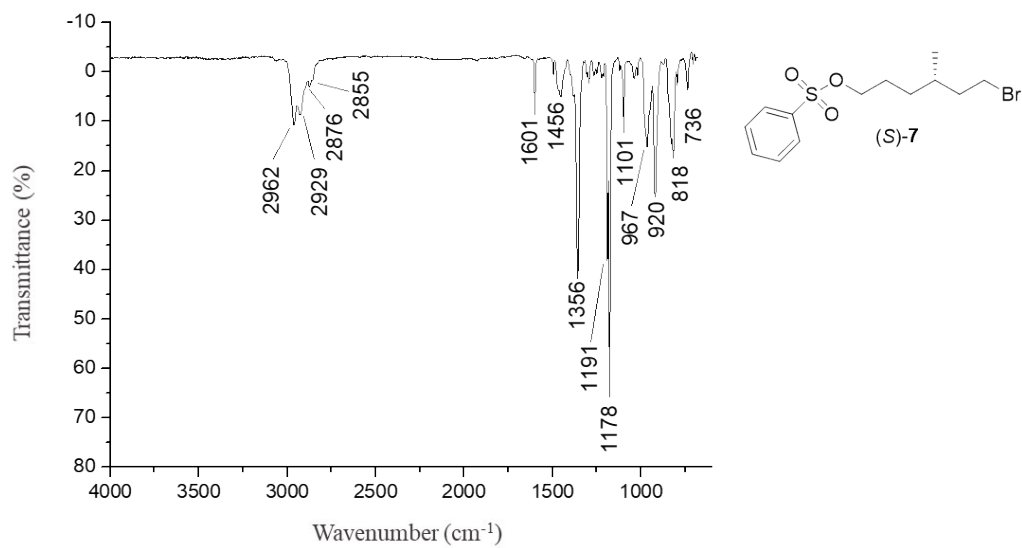

$^1\text{H}$  NMR (300 MHz,  $\text{CDCl}_3$ ) of compound (*S*)-**8**

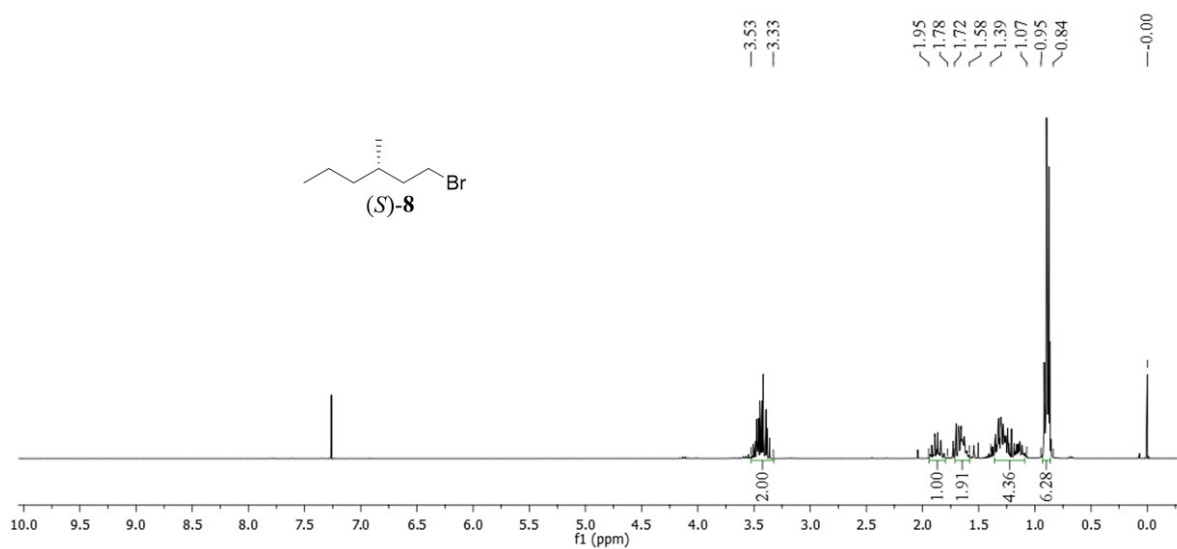

$^{13}\text{C}$  NMR (75 MHz,  $\text{CDCl}_3$ ) and DEPT 135 (superior) of compound (*S*)-**8**

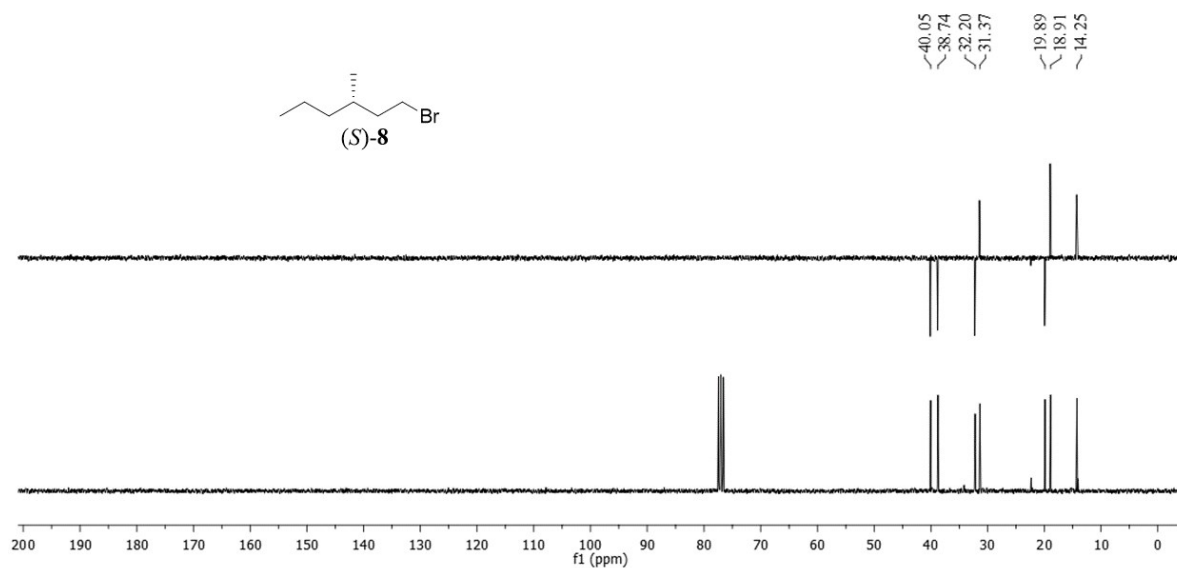

Mass spectrum (EI, 70 eV) of compound (*S*)-**8**

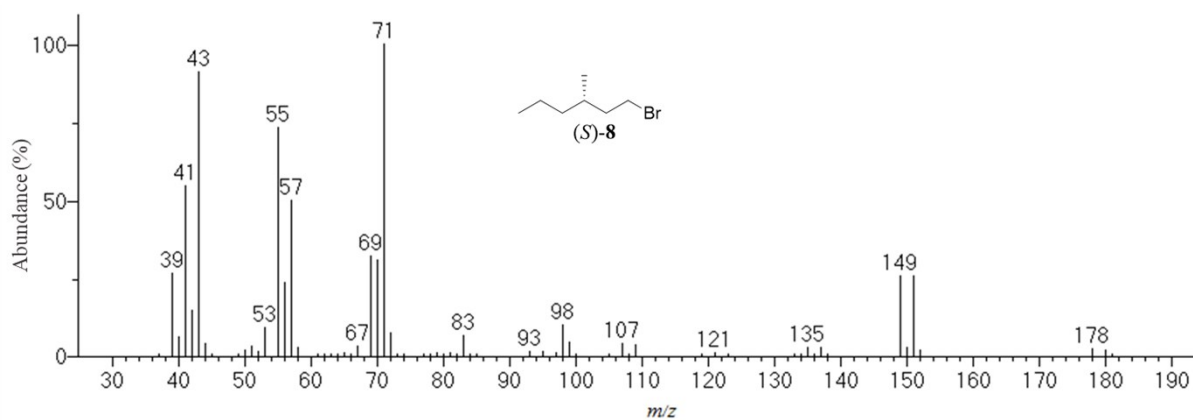

Infrared spectrum of compound (*S*)-**8**

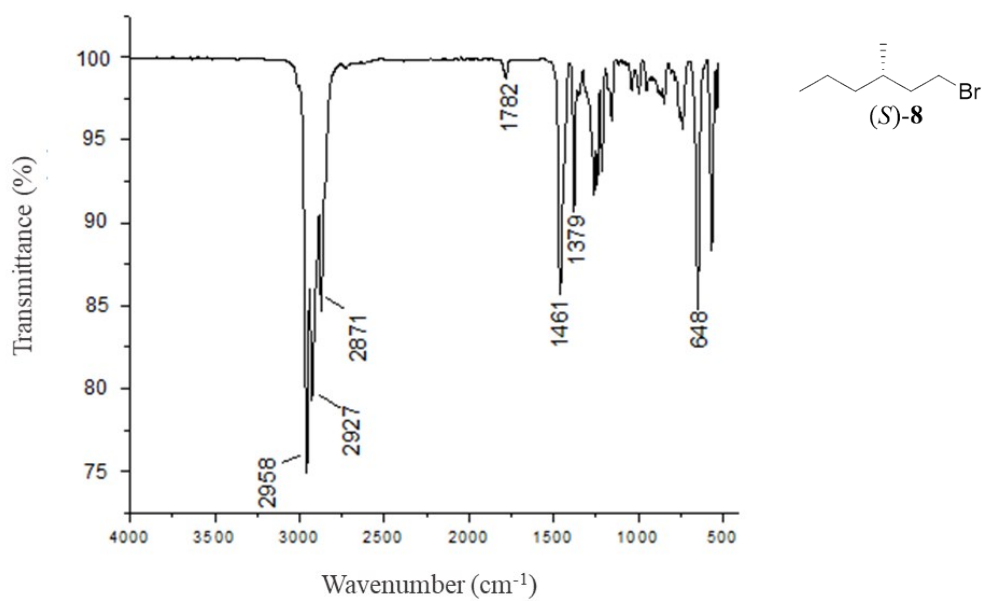

$^1\text{H}$  NMR (300 MHz,  $\text{CDCl}_3$ ) of compound (*S*)-**10**

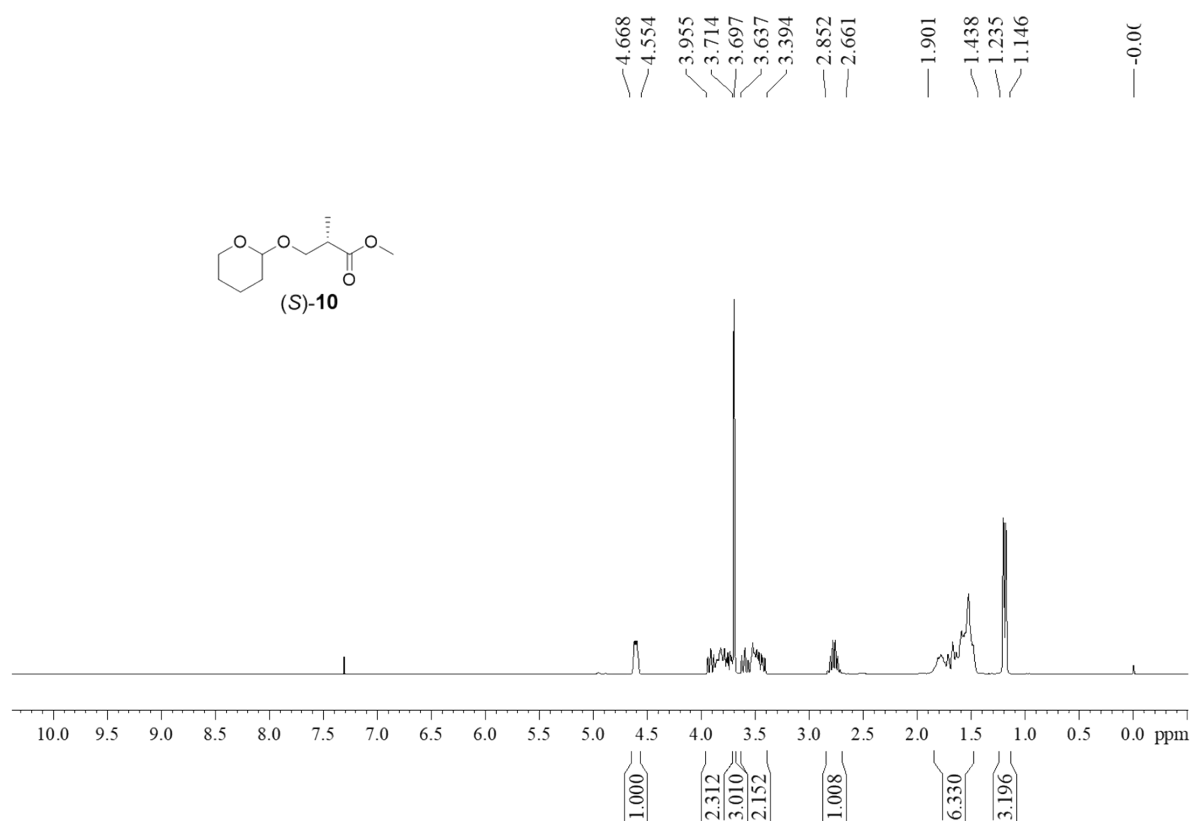

$^{13}\text{C}$  NMR (75 MHz,  $\text{CDCl}_3$ ) of compound (*S*)-**10**

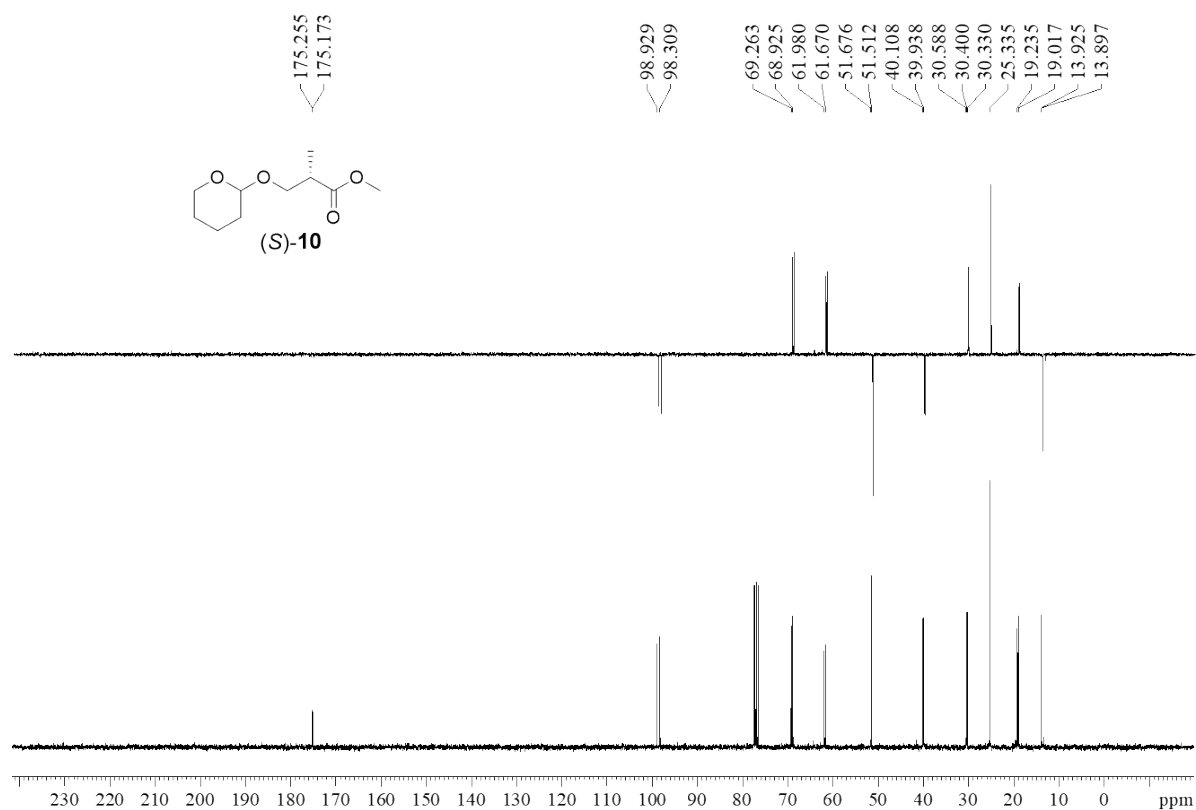



Mass spectrum (EI, 70 eV) of compound (S)-10

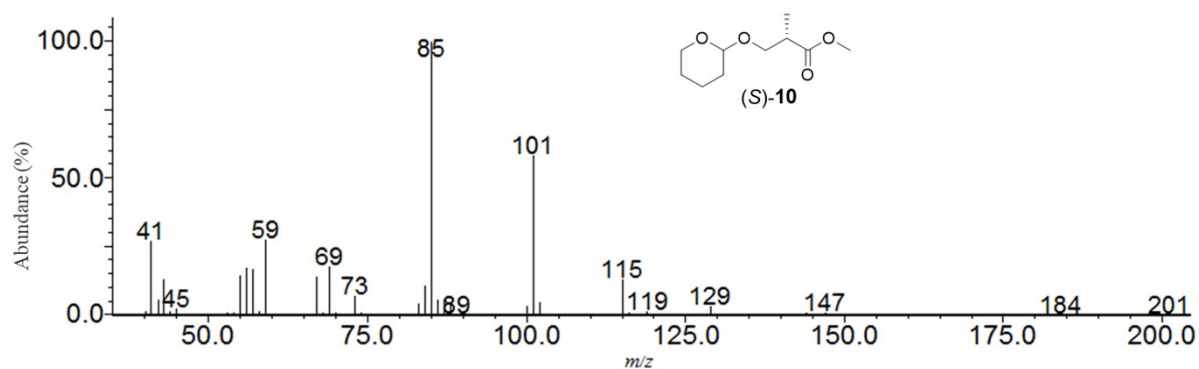

Infrared spectrum of compound (S)-10

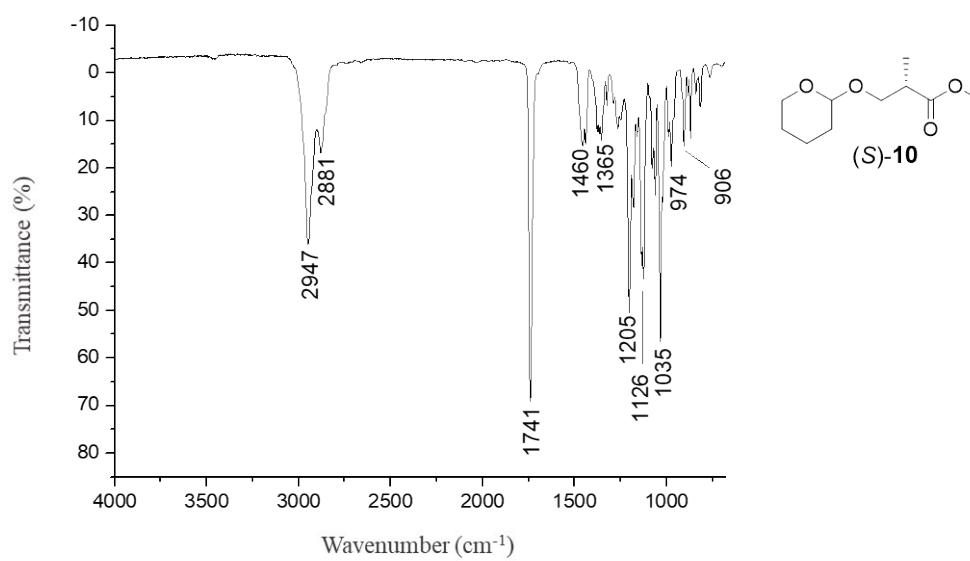

$^1\text{H}$  NMR (300 MHz,  $\text{CDCl}_3$ ) of compound (*R*)-**11**

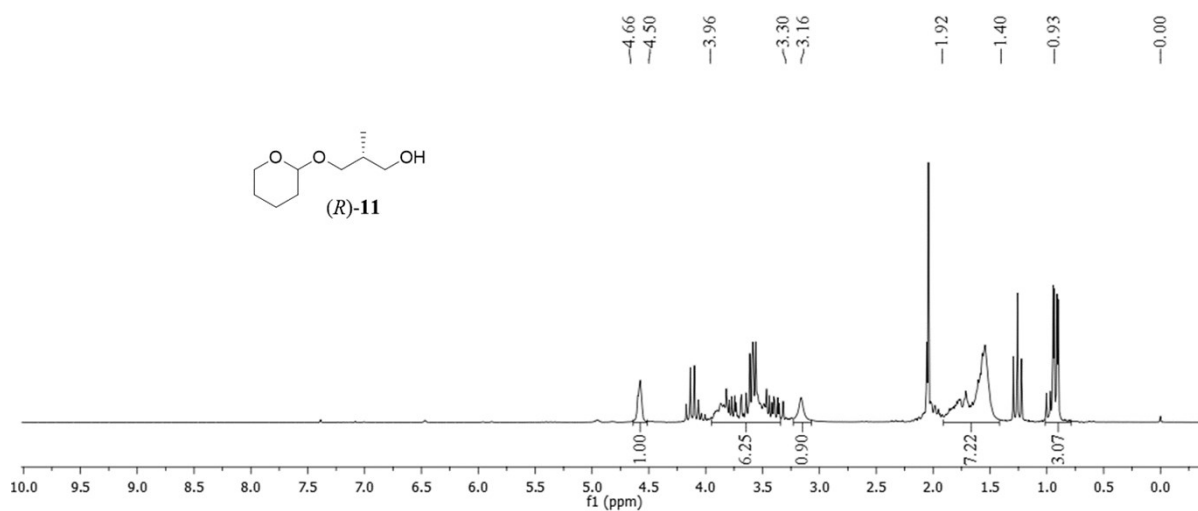

$^{13}\text{C}$  NMR (75 MHz,  $\text{CDCl}_3$ ) and DEPT 135 (superior) of compound (*R*)-**11**

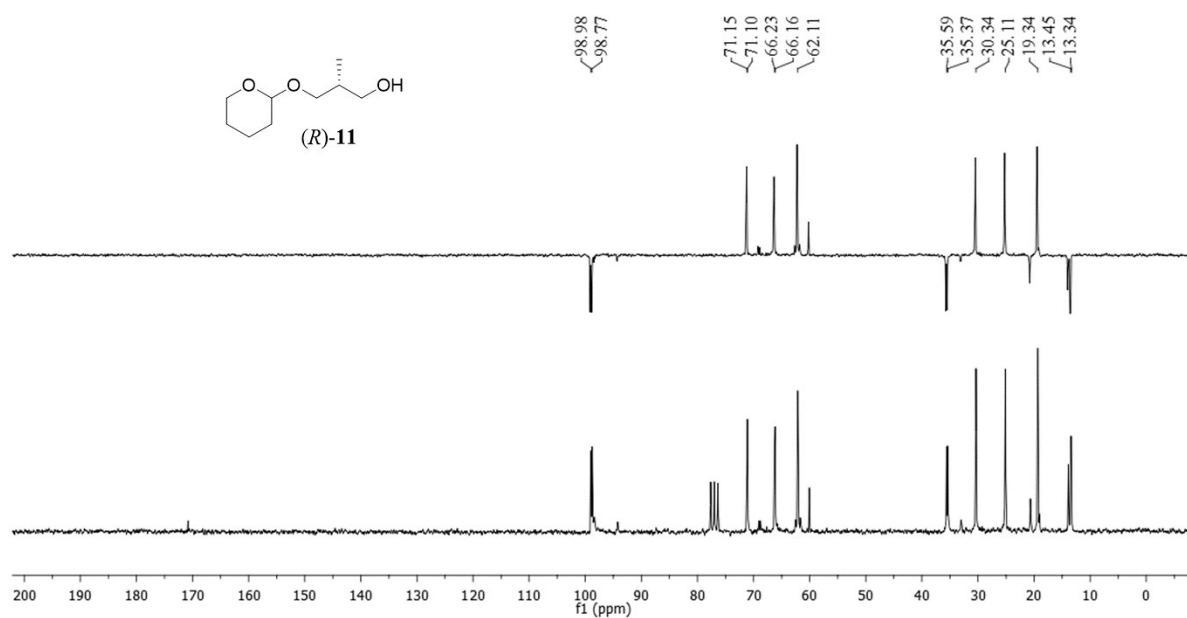

Mass spectrum (EI, 70 eV) of compound (*R*)-**11**

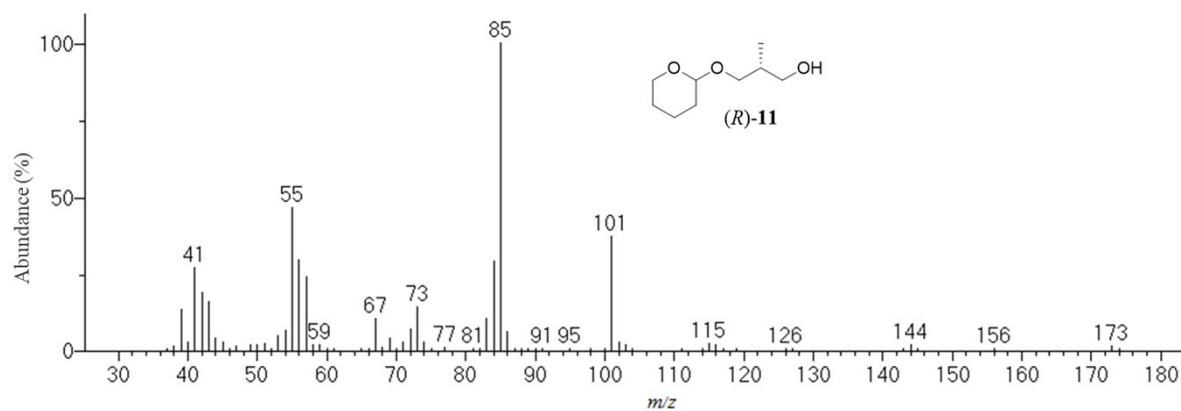

Infrared spectrum of compound (*R*)-**11**

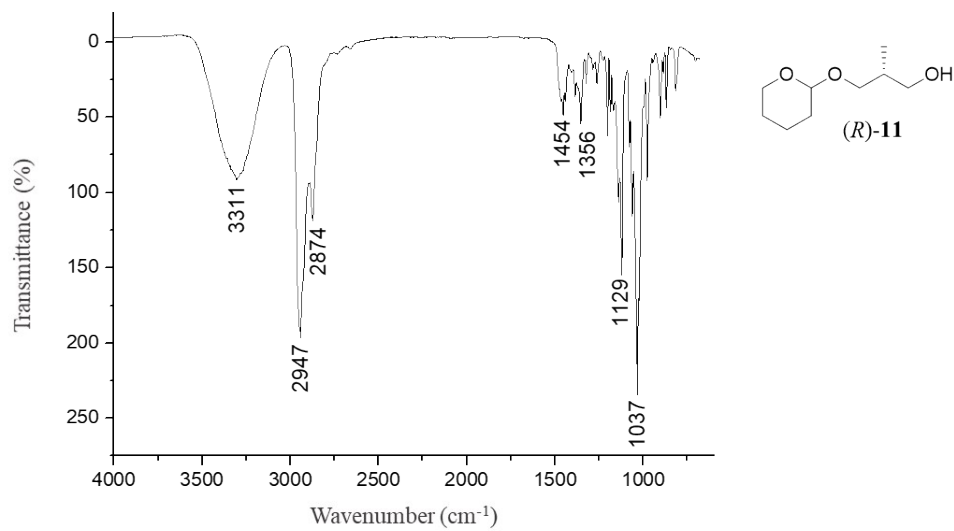



$^1\text{H}$  NMR (300 MHz,  $\text{CDCl}_3$ ) of compound (*S*)-**12**

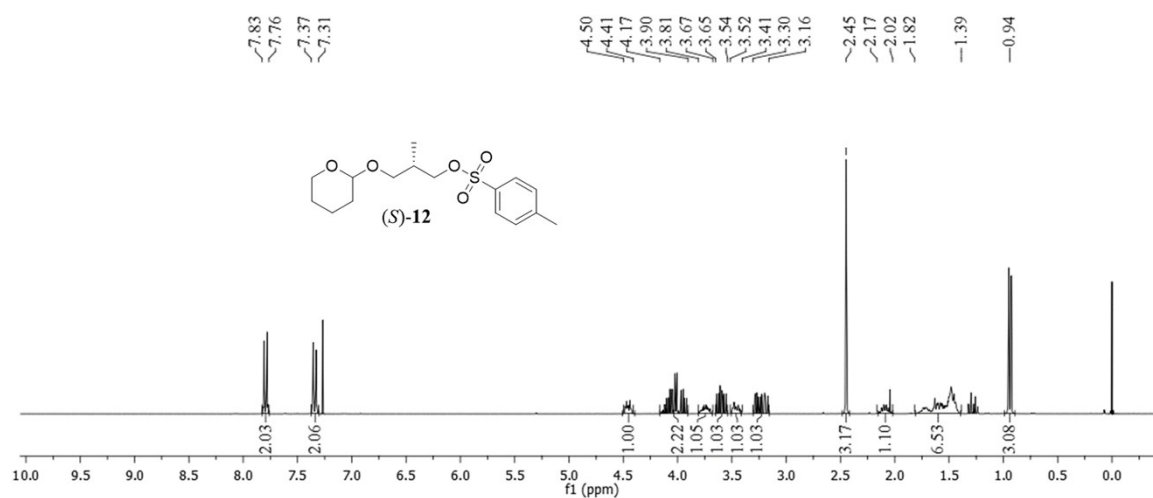

$^{13}\text{C}$  NMR (75 MHz,  $\text{CDCl}_3$ ) and DEPT 135 (superior) of compound (*S*)-**12**

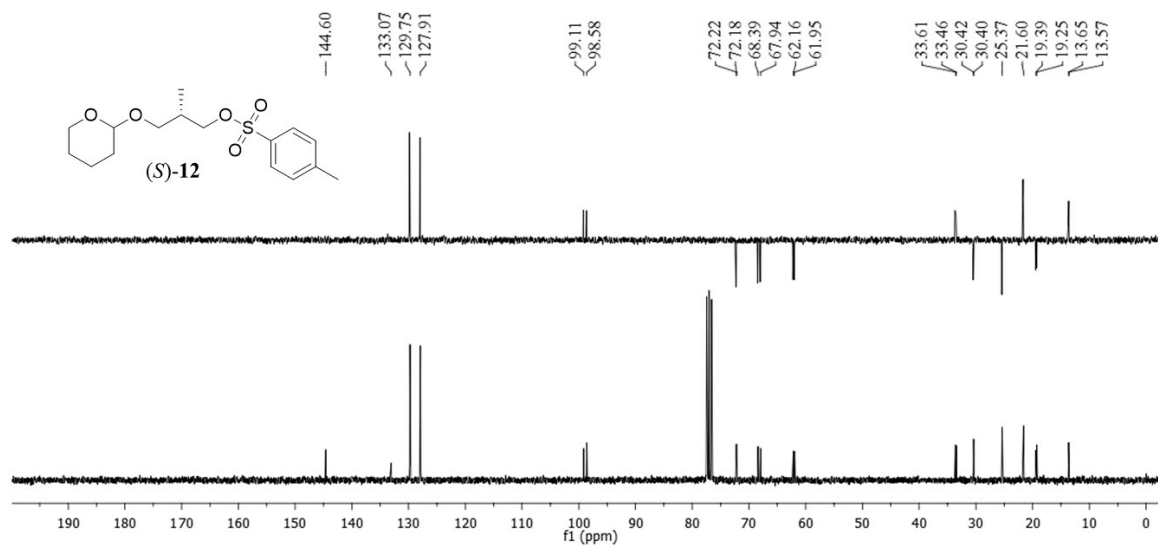

Mass spectrum (EI, 70 eV) of compound (S)-12

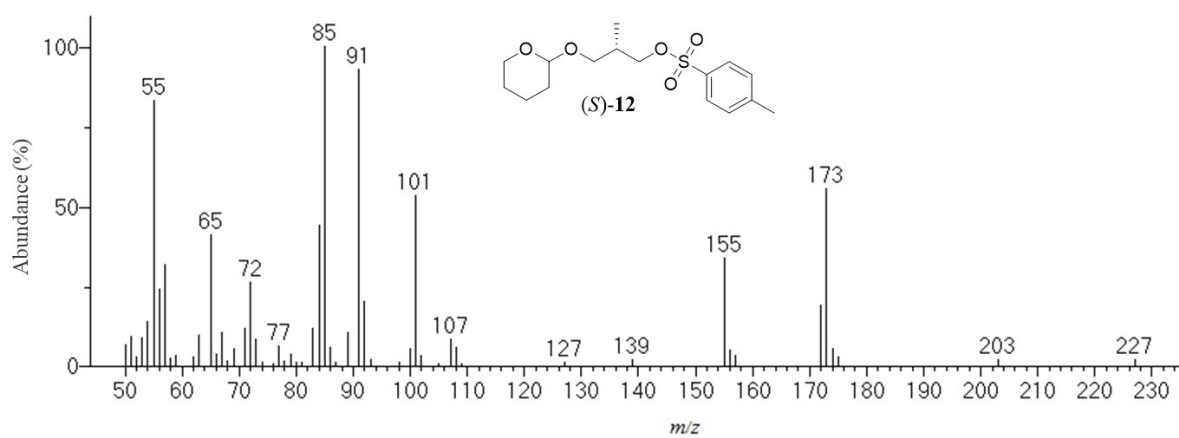

Infrared spectrum of compound (S)-12

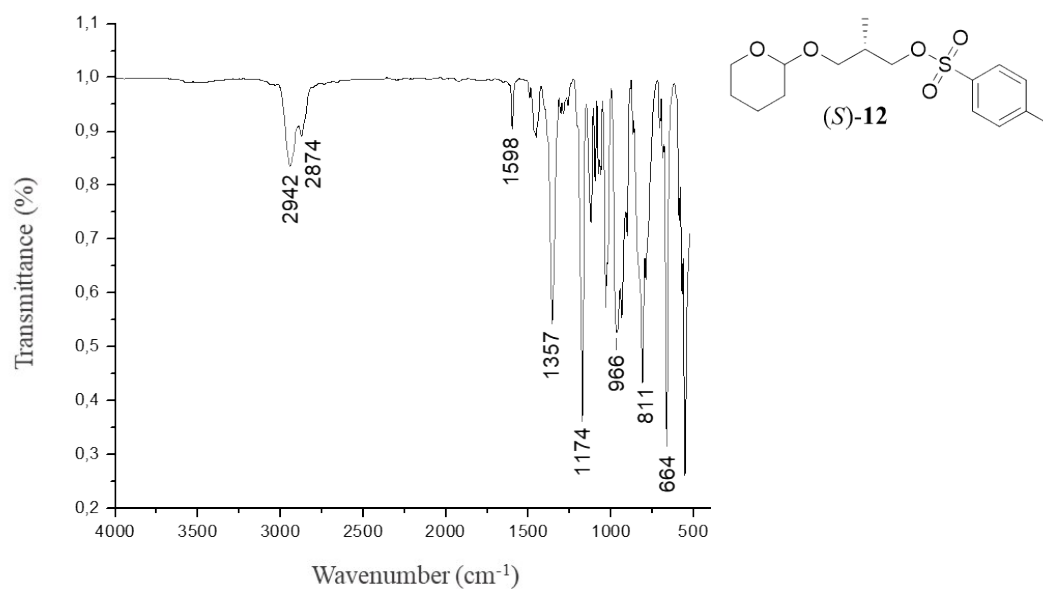

$^1\text{H}$  NMR (200 MHz,  $\text{CDCl}_3$ ) of compound (2*R*,6*R*)-**13**

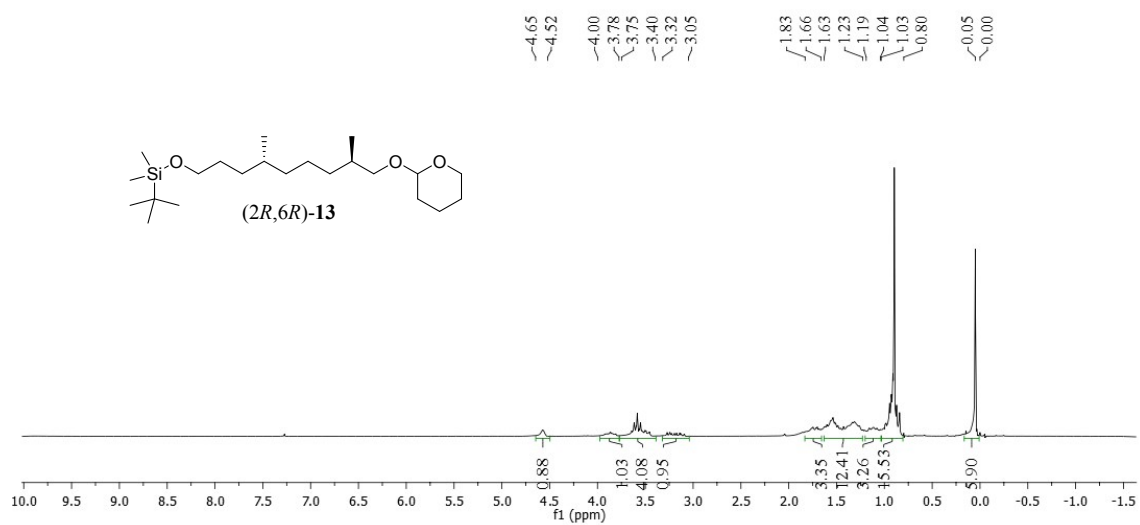

$^{13}\text{C}$  NMR (50 MHz) and DEPT 135 (superior) of compound (2*R*,6*R*)-**13**

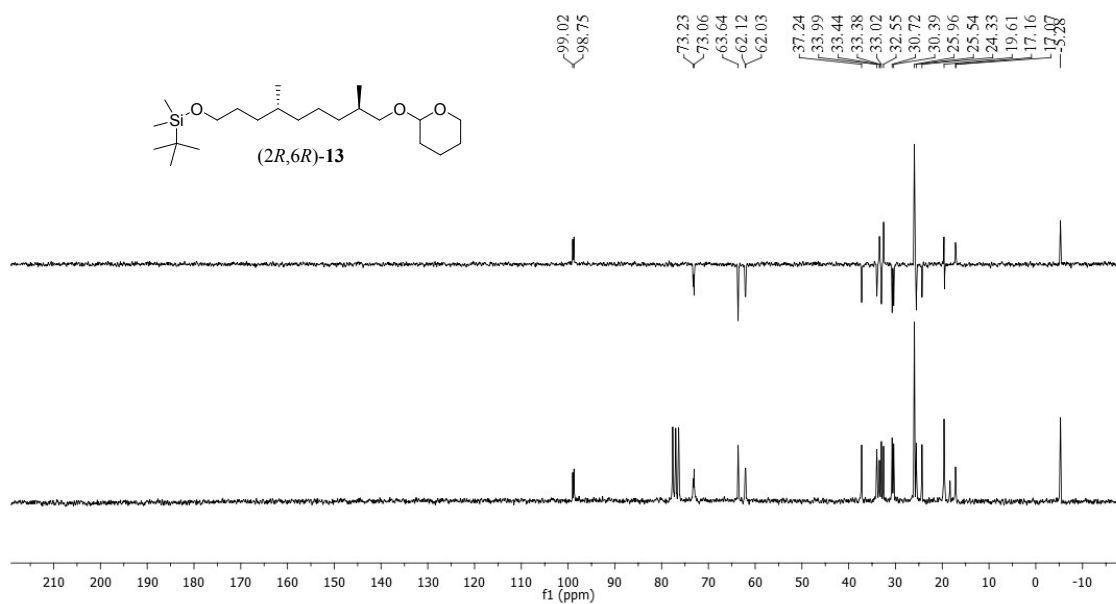

Mass spectrum (EI, 70 eV) of compound (2*R*,6*R*)-**13**

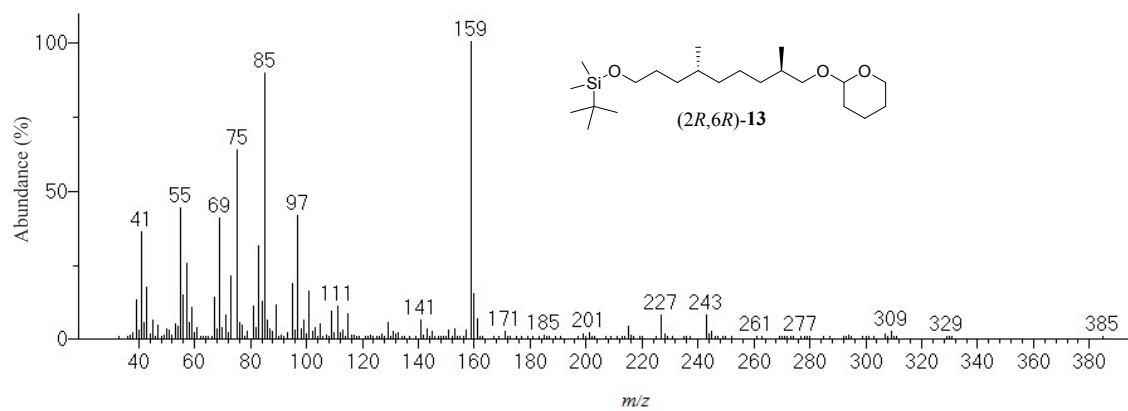

$^1\text{H}$  NMR (200 MHz,  $\text{CDCl}_3$ ) of compound (2*R*,6*R*)-**14**

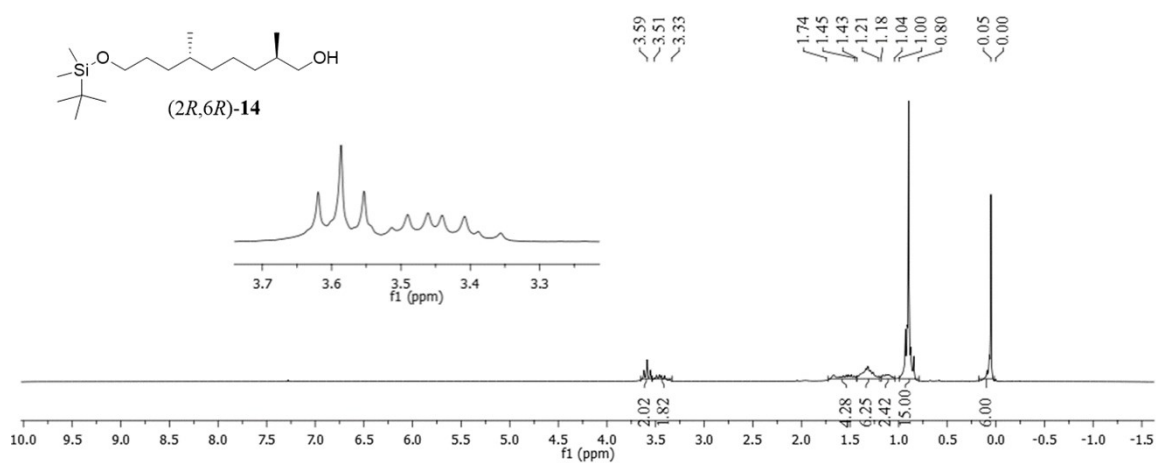

$^{13}\text{C}$  NMR (50 MHz,  $\text{CDCl}_3$ ) and DEPT 135 (superior) of compound (2*R*,6*R*)-**14**

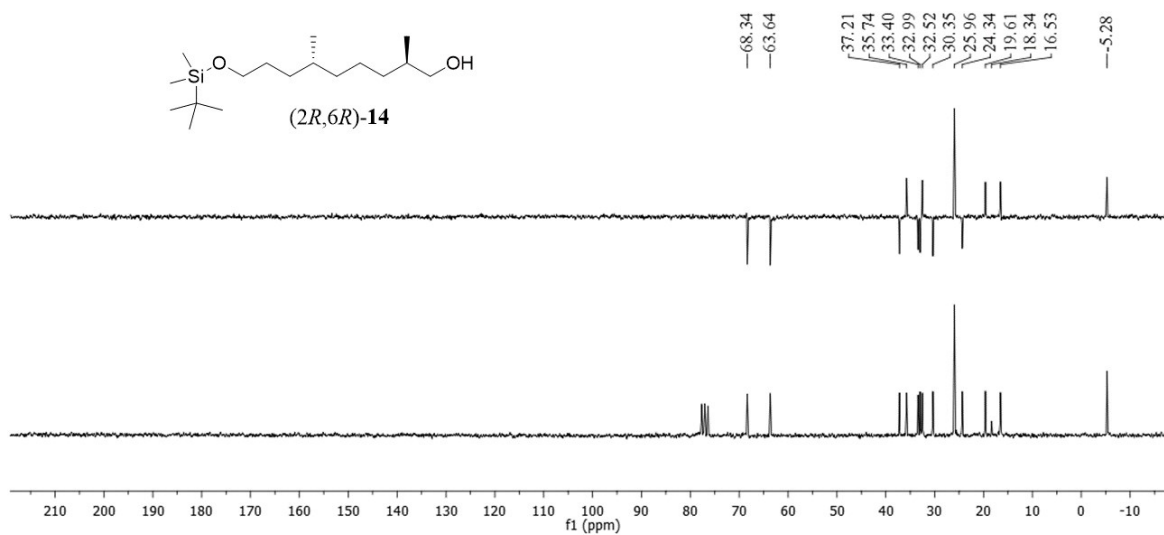

Mass spectrum (EI, 70 eV) of compound (2*R*,6*R*)-**14**

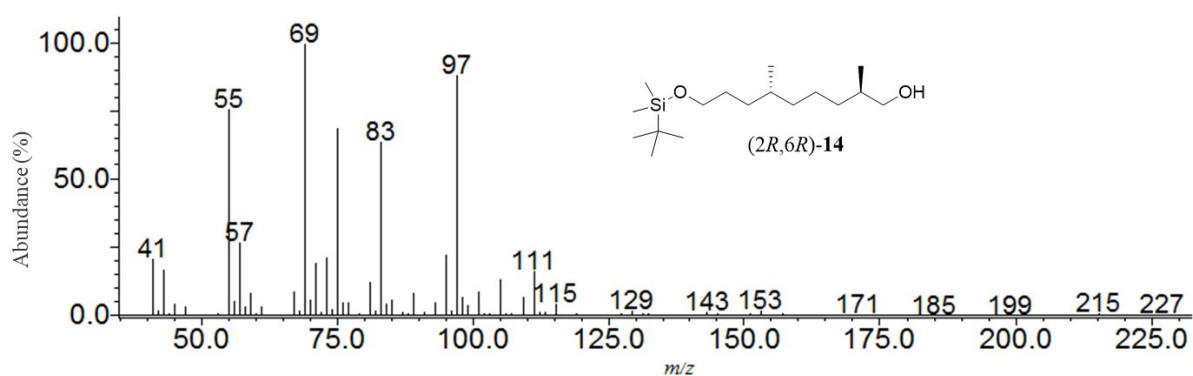Infrared spectrum of compound (2*R*,6*R*)-**14**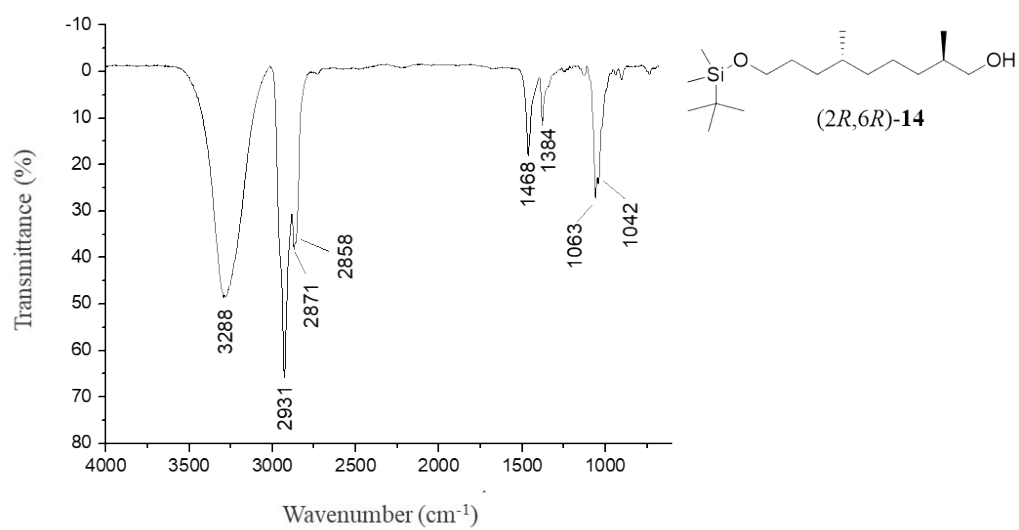

$^1\text{H}$  NMR (200 MHz,  $\text{CDCl}_3$ ) of compound (2*R*,6*R*)-**15**

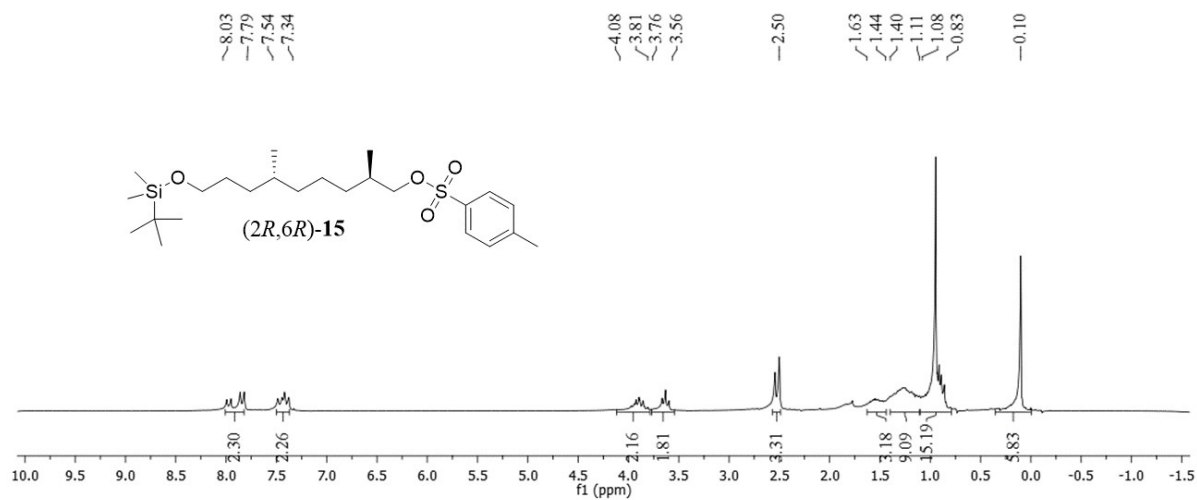

$^{13}\text{C}$  NMR (50 MHz,  $\text{CDCl}_3$ ) and DEPT 135 (superior) of compound (2*R*,6*R*)-**15**

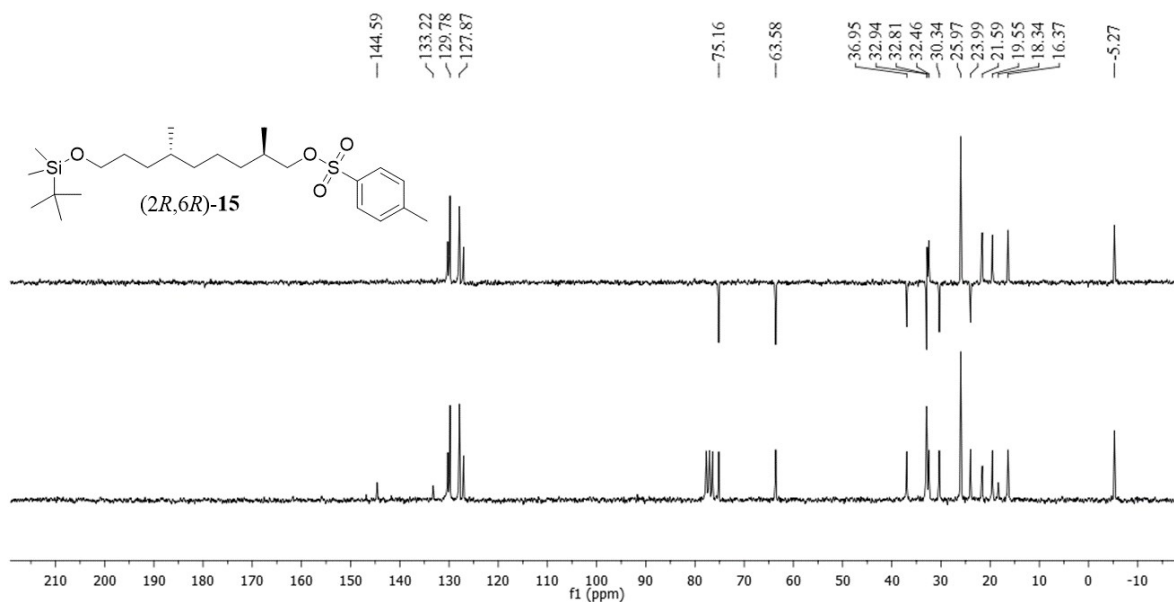

Mass spectrum (EI, 70 eV) of compound (2*R*,6*R*)-15

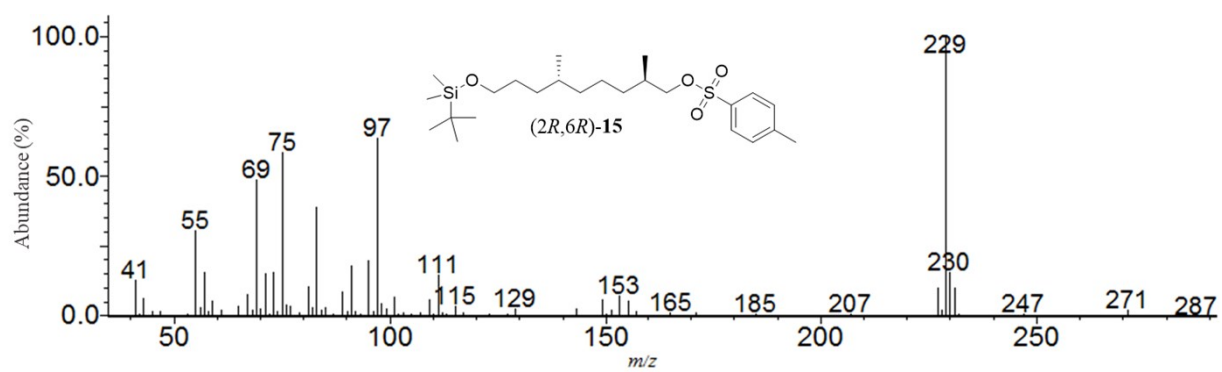



$^1\text{H}$  NMR (200 MHz,  $\text{CDCl}_3$ ) of compound (4*R*,8*S*,12*S*)-**16**

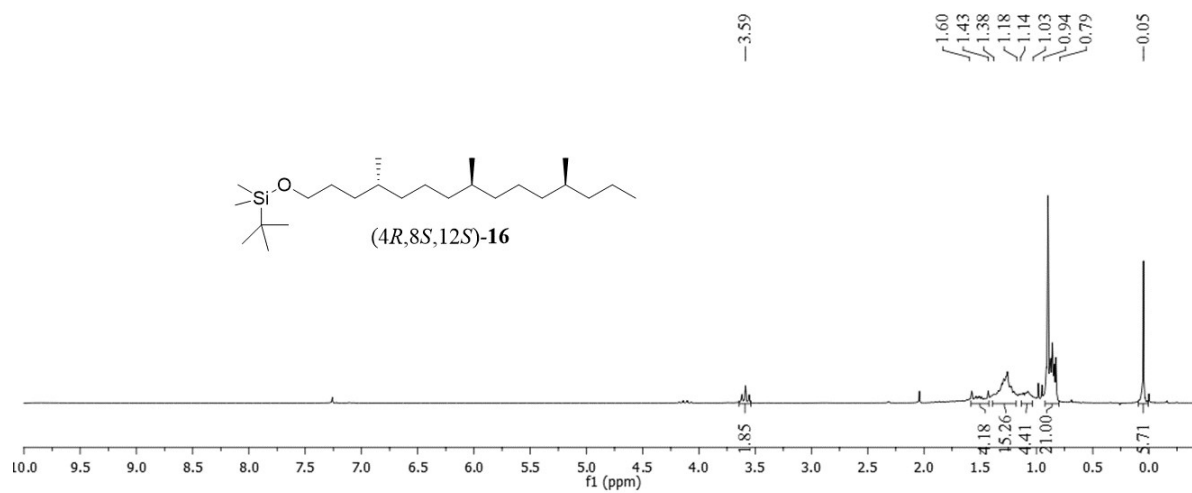

$^{13}\text{C}$  NMR (50 MHz,  $\text{CDCl}_3$ ) and DEPT 135 (superior) of compound (4*R*,8*S*,12*S*)-**16**

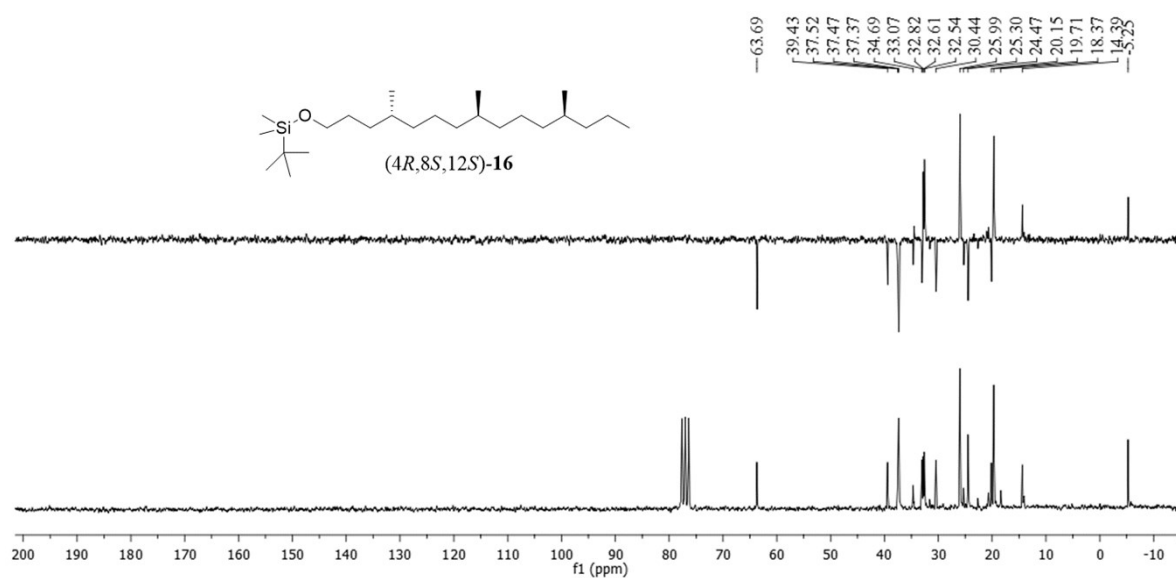

Mass spectrum (EI, 70 eV) of compound (4*R*,8*S*,12*S*)-**16**

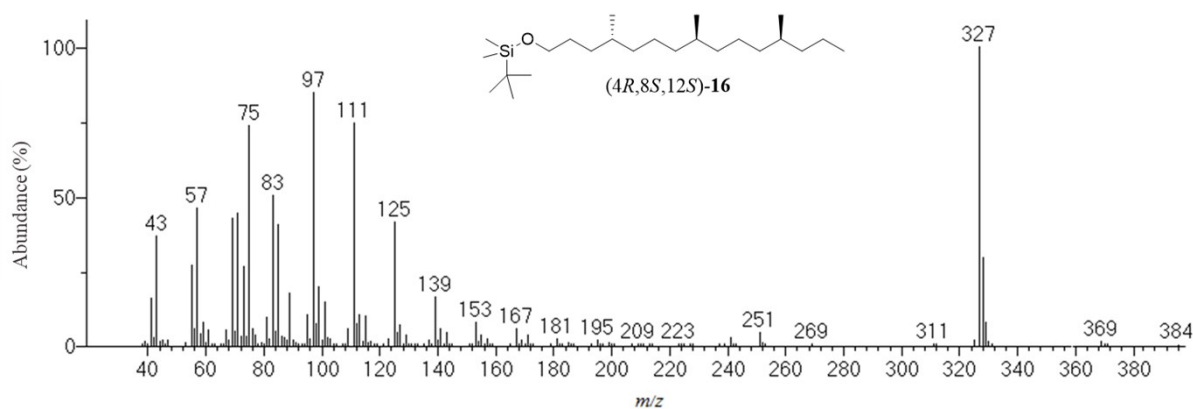

Infrared spectrum of compound (4*R*,8*S*,12*S*)-**16**

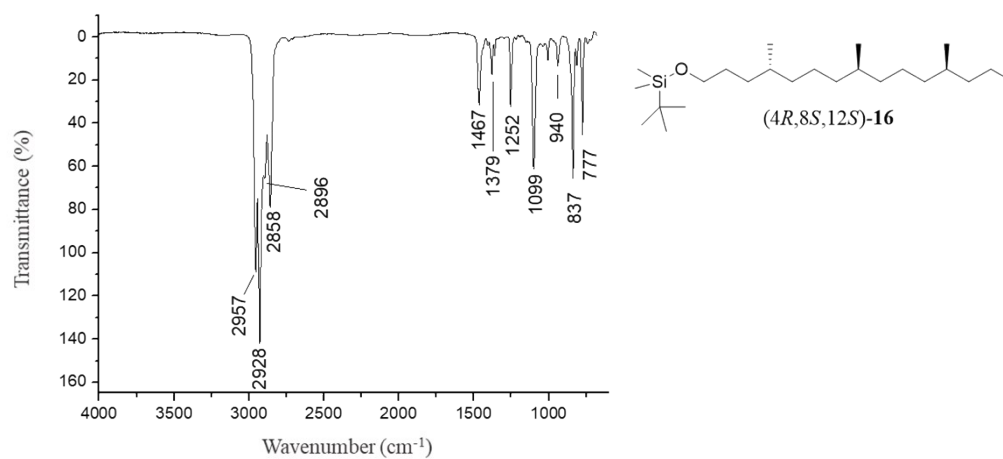

$^1\text{H}$  NMR (300 MHz,  $\text{CDCl}_3$ ) of compound (4*S*,8*S*,12*S*)-**17**

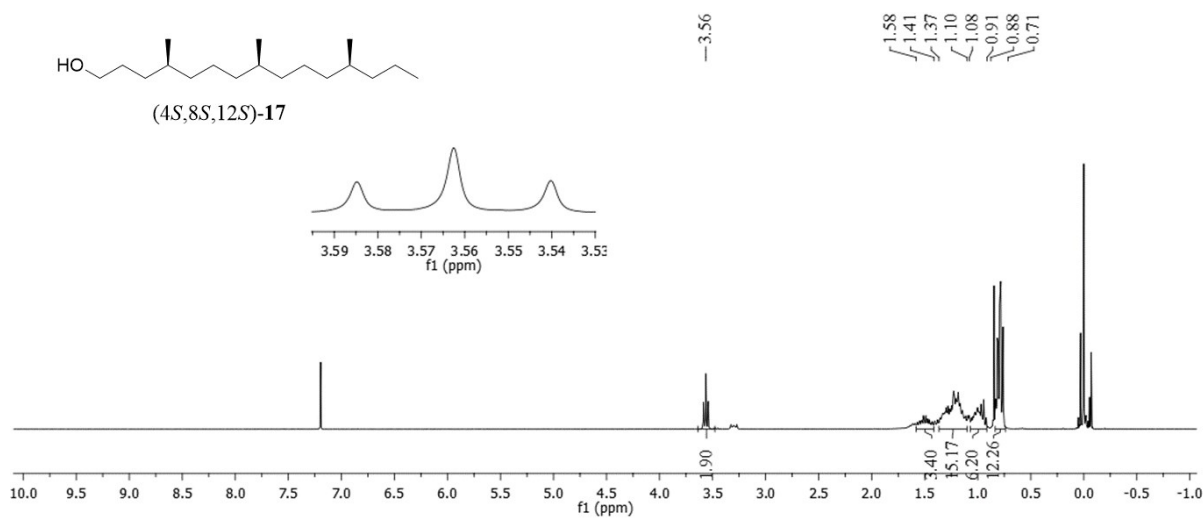

$^{13}\text{C}$  NMR (75 MHz,  $\text{CDCl}_3$ ) and DEPT 135 (superior) of compound (4*S*,8*S*,12*S*)-**17**

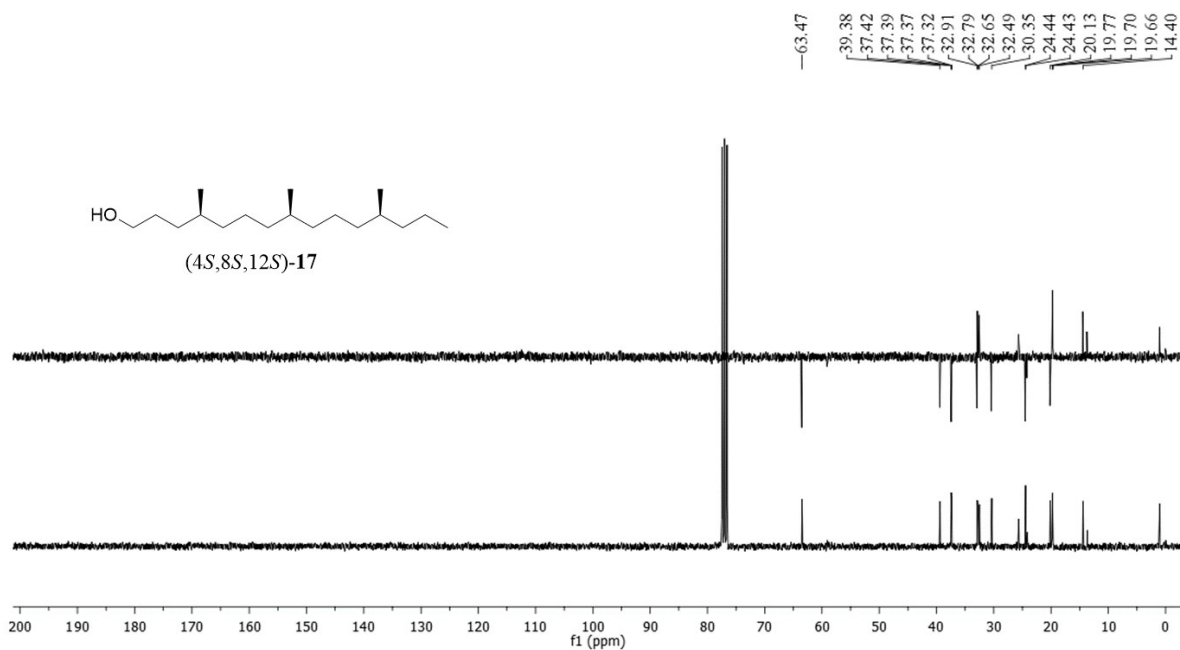

Mass spectrum (EI, 70 eV) of compound (4*S*,8*S*,12*S*)-**17**

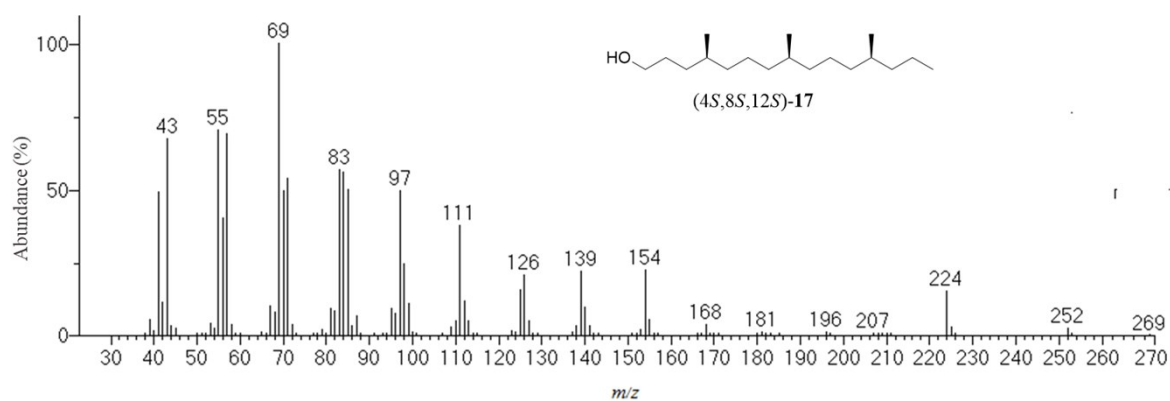

Infrared spectrum of compound (4*S*,8*S*,12*S*)-**17**

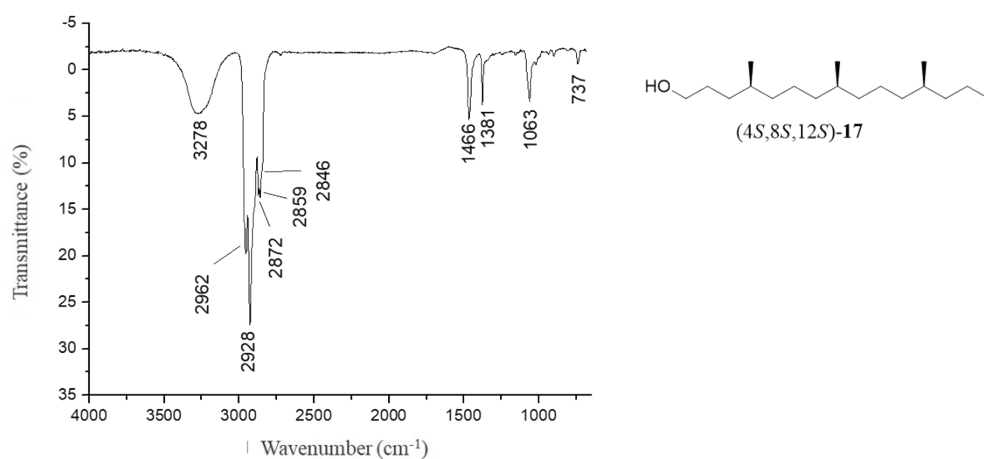

Mass spectrum (EI, 70 eV) of (4*S*,8*S*,12*S*)-trimethylpentadecanoic acid

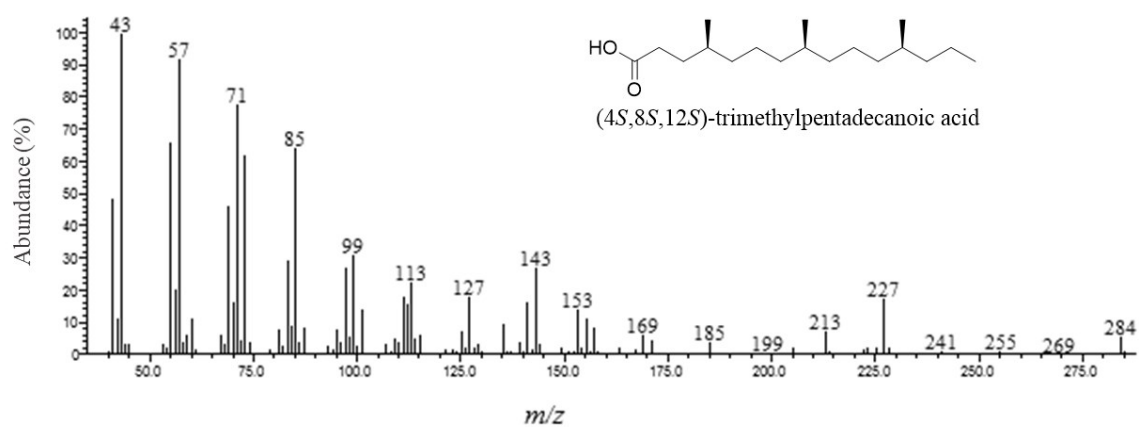

Infrared spectrum of compound (4*S*,8*S*,12*S*)-trimethylpentadecanoic acid

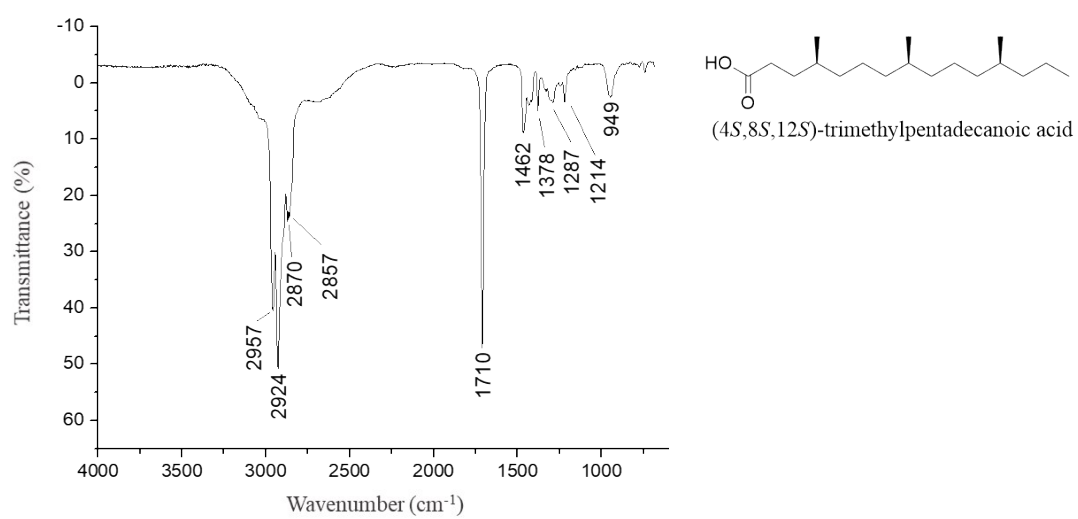

$^1\text{H}$  NMR (200 MHz,  $\text{CDCl}_3$ ) of compound (4*S*,8*S*,12*S*)-1

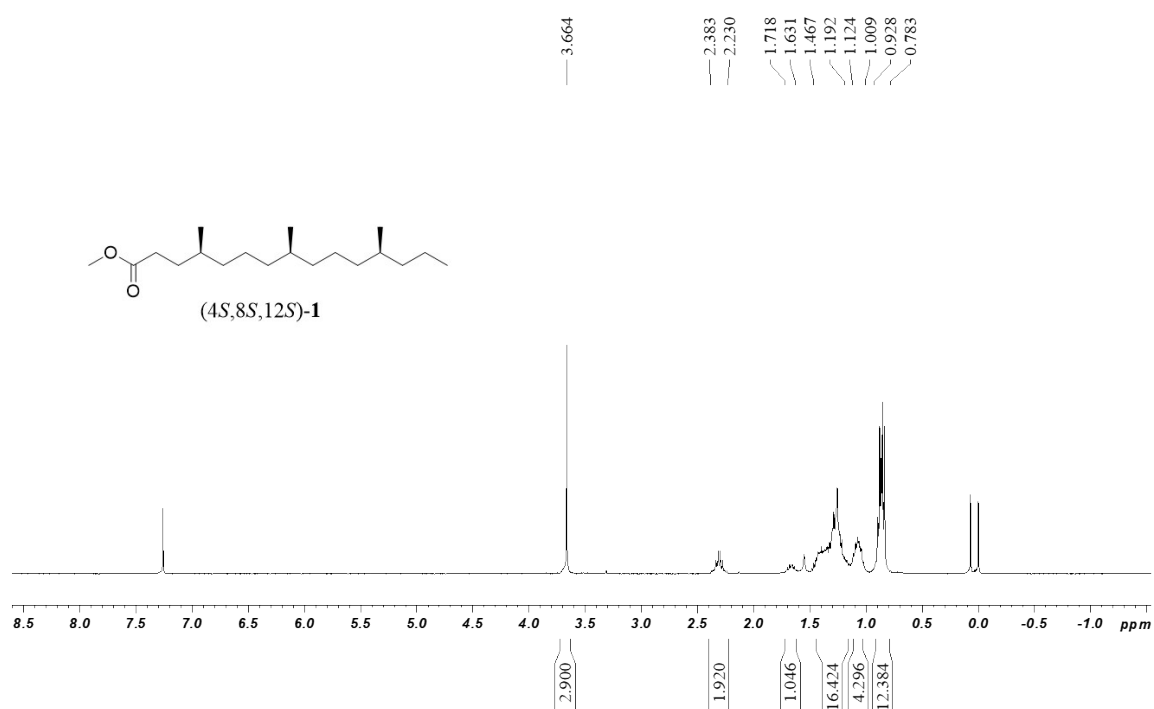

$^{13}\text{C}$  NMR (50 MHz,  $\text{CDCl}_3$ ) and DEPT 135 (superior) of compound (4*S*,8*S*,12*S*)-1

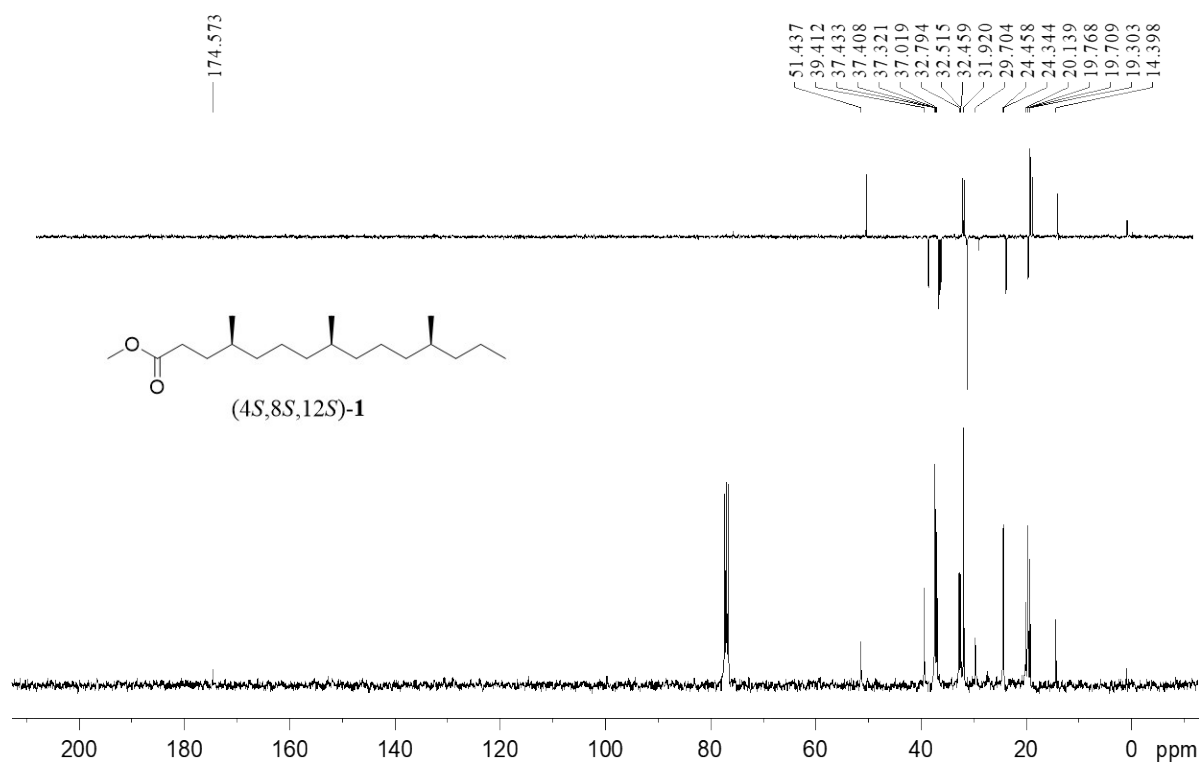

Mass spectrum (EI, 70 eV) of compound (4*S*,8*S*,12*S*)-1

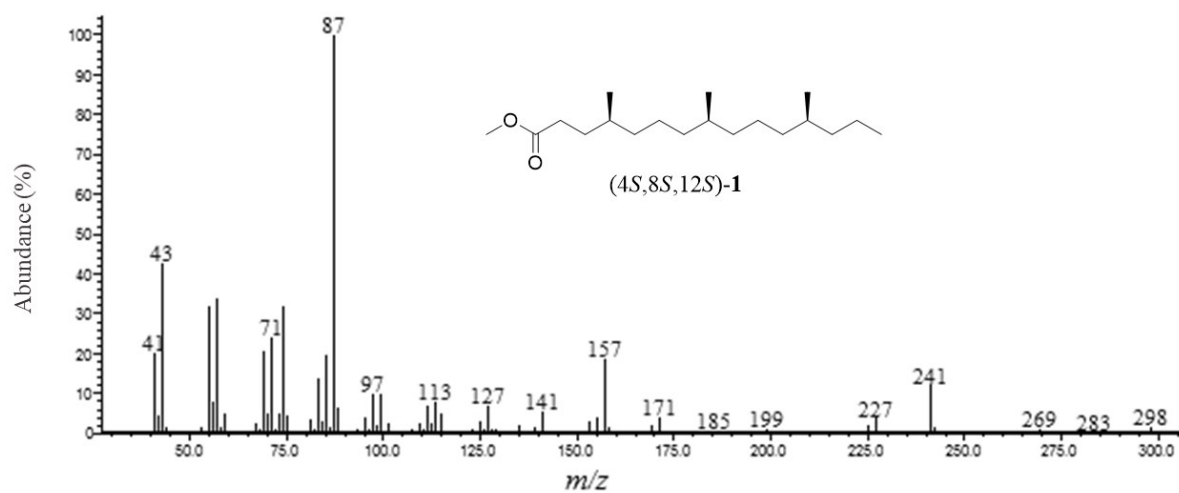

Infrared spectrum of compound (4*S*,8*S*,12*S*)-1

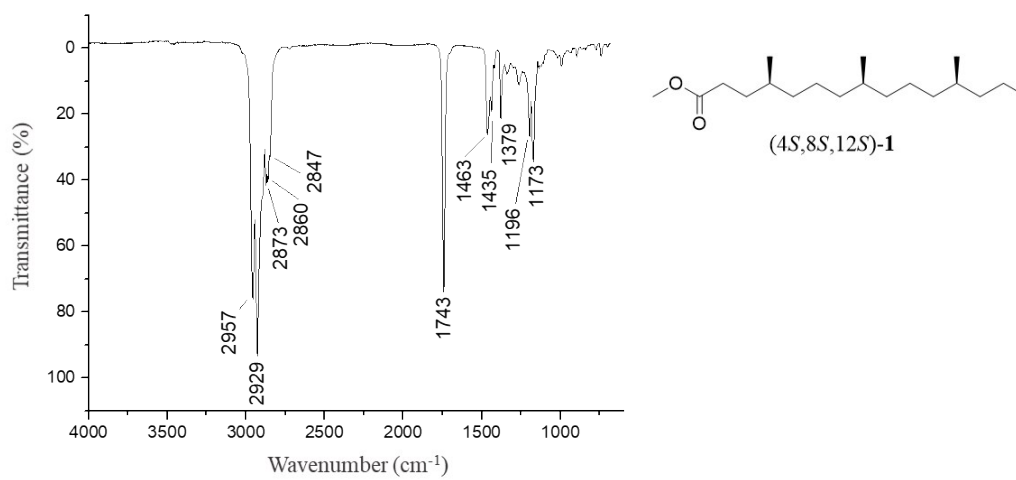

$^1\text{H}$  NMR (200 MHz,  $\text{CDCl}_3$ ) of compound (2*R*,6*R*)-**18**

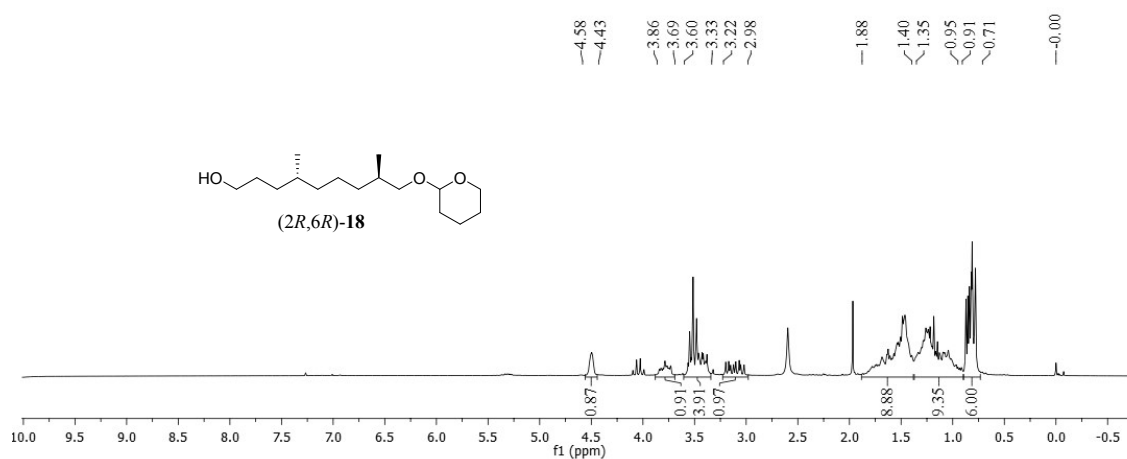

$^{13}\text{C}$  NMR (50 MHz,  $\text{CDCl}_3$ ) and DEPT 135 (superior) of compound (2*R*,6*R*)-**18**

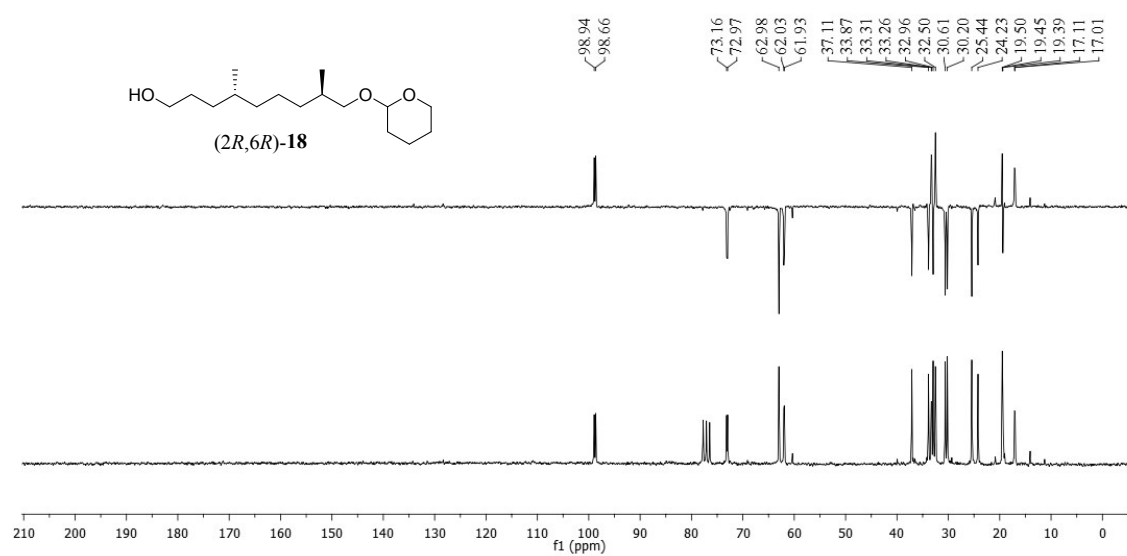



Mass spectrum (EI, 70 eV) of compound (2*R*,6*R*)-**18**

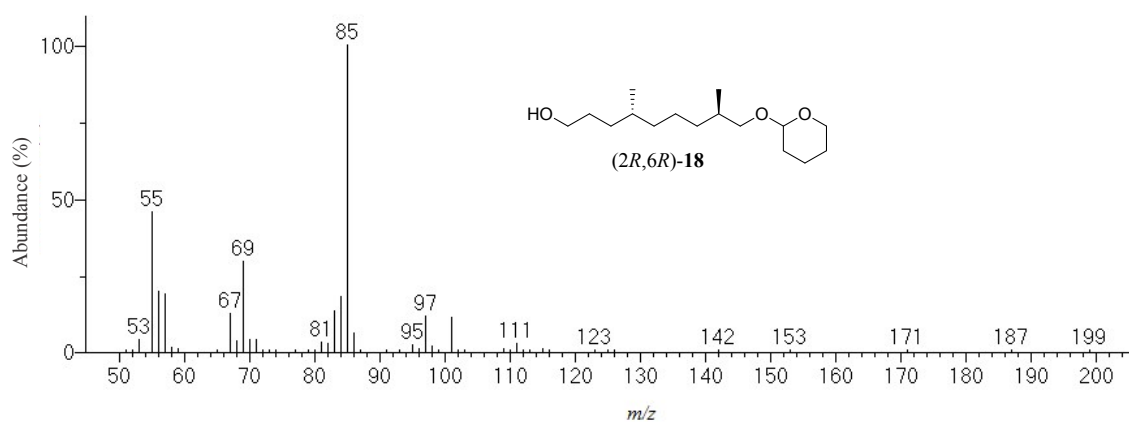

Infrared spectrum of compound (2*R*,6*R*)-**18**

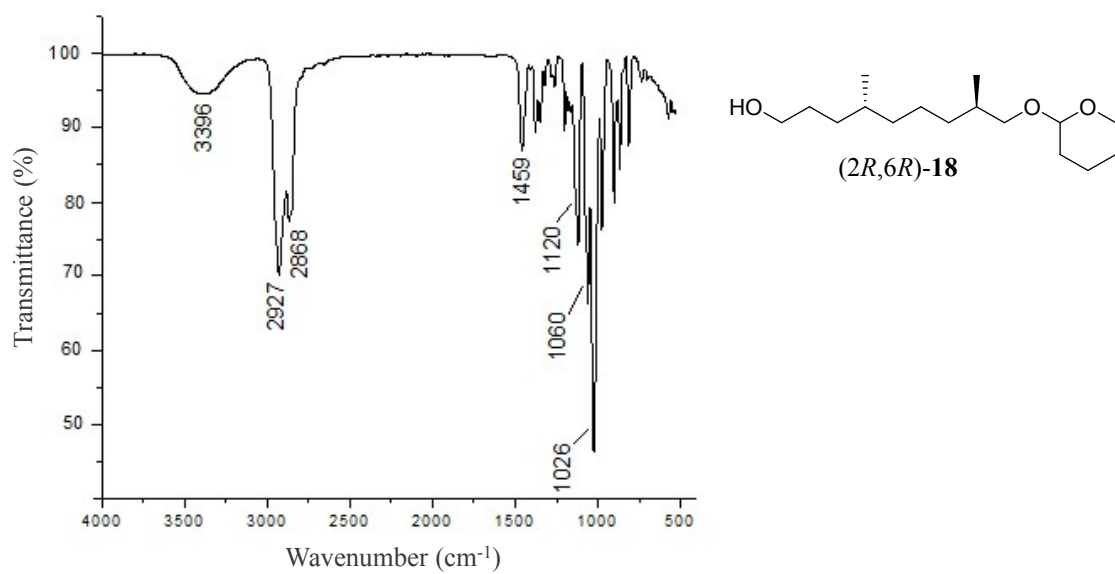

$^1\text{H}$  NMR (300 MHz,  $\text{CDCl}_3$ ) of compound (4*S*,8*R*)-**19**

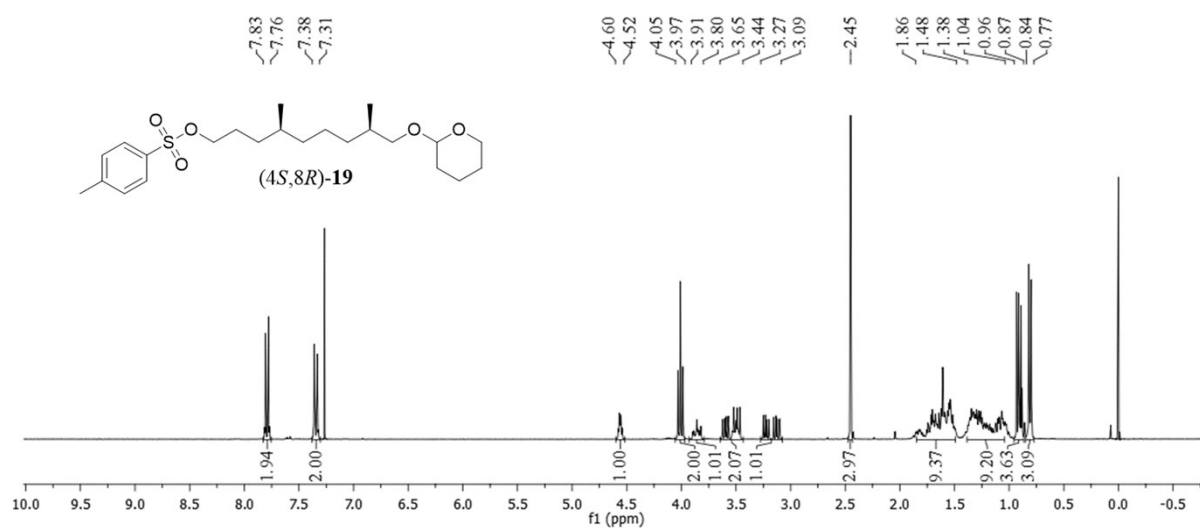

$^{13}\text{C}$  NMR (75 MHz,  $\text{CDCl}_3$ ) and DEPT 135 (superior) of compound (4*S*,8*R*)-**19**

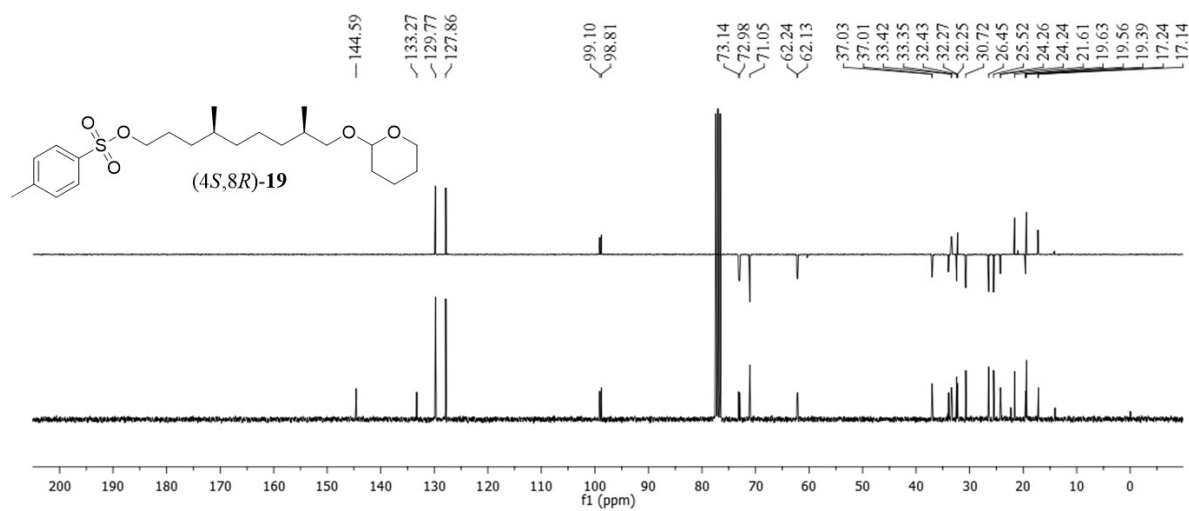

Mass spectrum (EI, 70 eV) of compound (4*S*,8*R*)-**19**

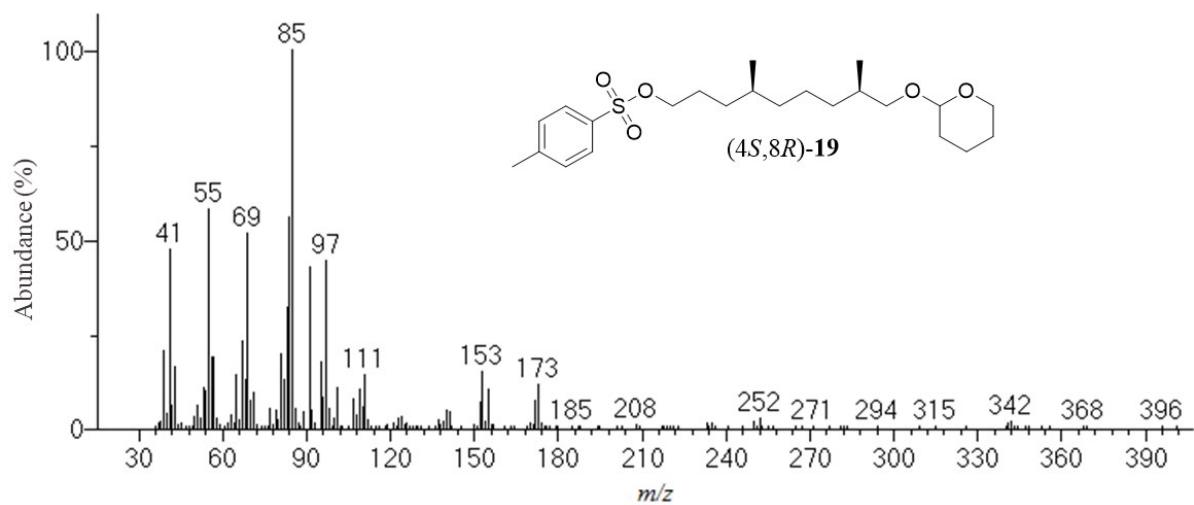

Infrared spectrum of compound (4*S*,8*R*)-**19**

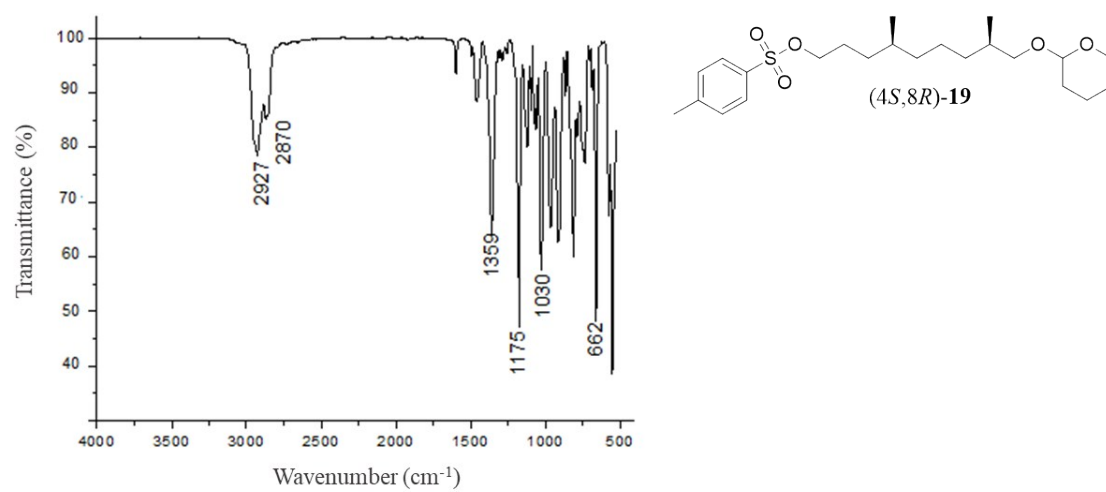

$^1\text{H}$  NMR (300 MHz,  $\text{CDCl}_3$ ) of compound (2*R*,6*R*)-**20**

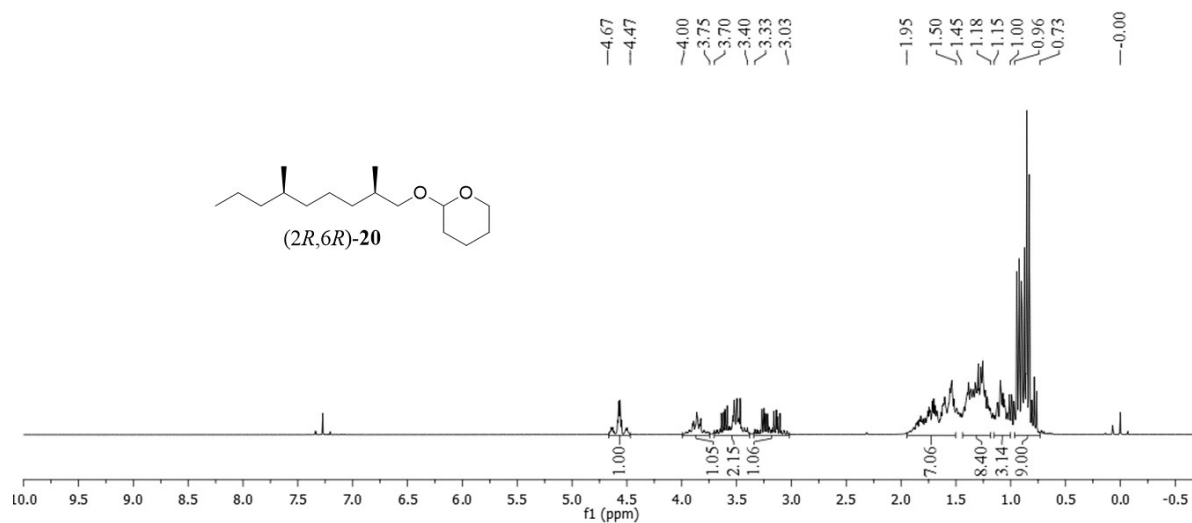

$^{13}\text{C}$  NMR (50 MHz,  $\text{CDCl}_3$ ) and DEPT 135 (superior) of compound (2*R*,6*R*)-**20**

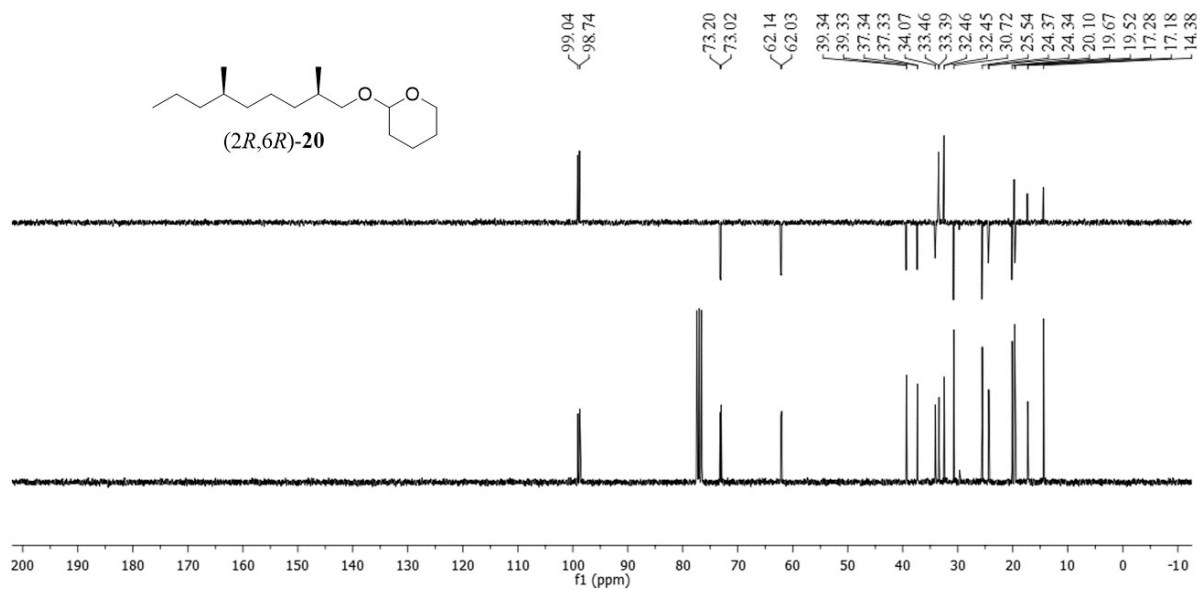

Mass spectrum (EI, 70 eV) of compound (2*R*,6*R*)-**20**

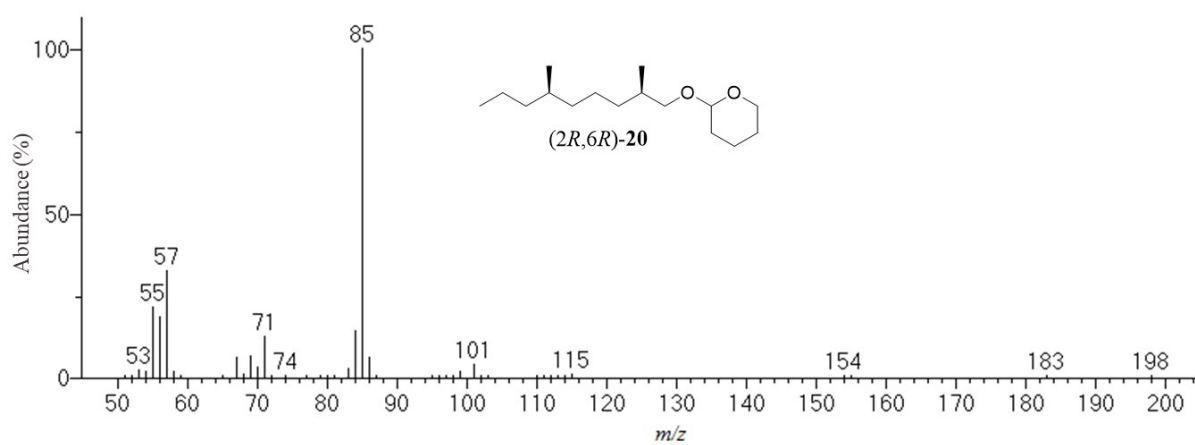

Infrared spectrum of compound (2*R*,6*R*)-**20**

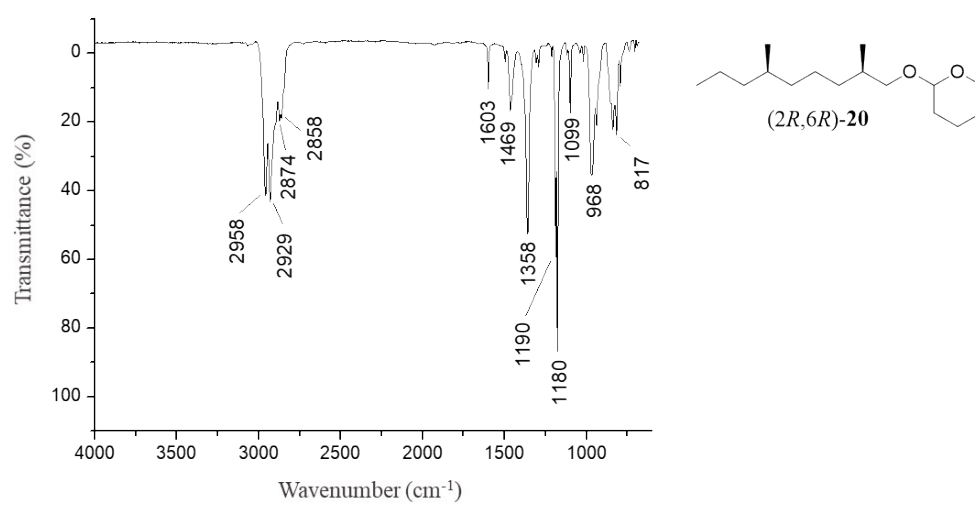

$^1\text{H}$  NMR (300 MHz,  $\text{CDCl}_3$ ) of compound (2*R*,6*R*)-**21**

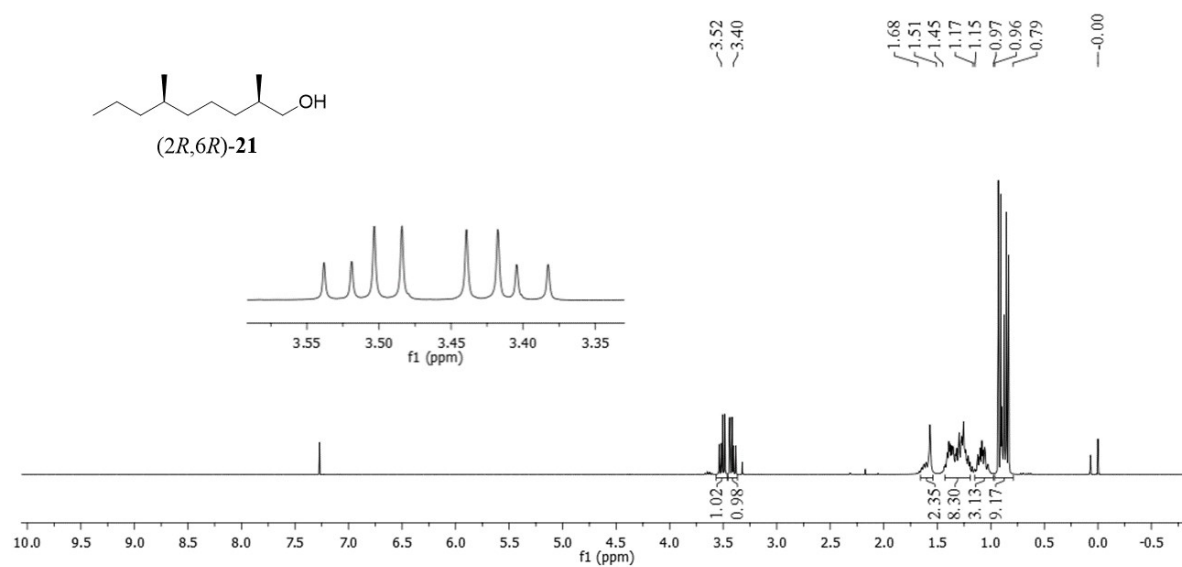

$^{13}\text{C}$  NMR (75 MHz,  $\text{CDCl}_3$ ) and DEPT 135 (superior) of compound (2*R*,6*R*)-**21**

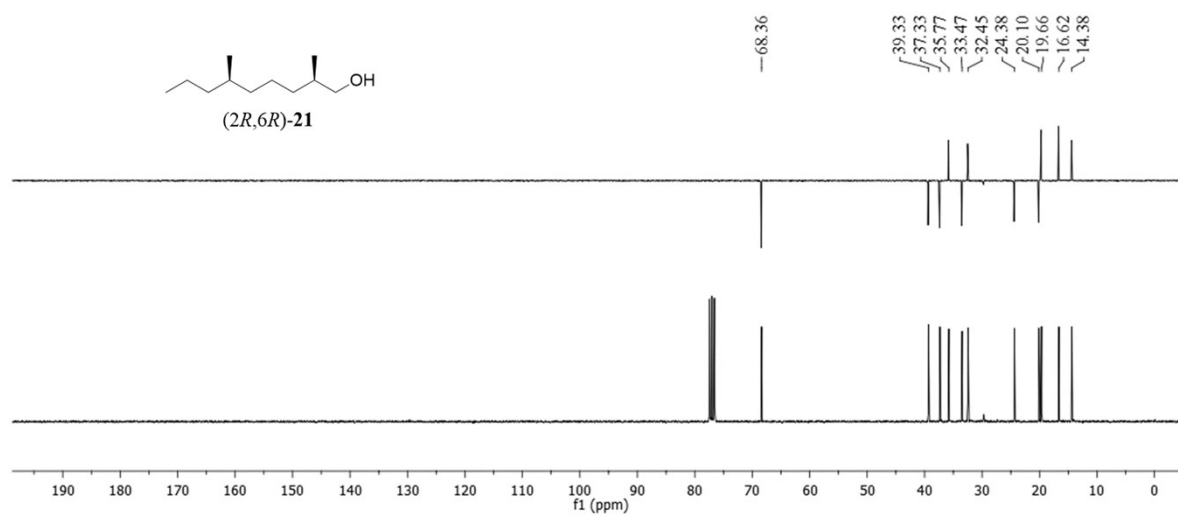

Mass spectrum (EI, 70 eV) of compound (2*R*,6*R*)-**21**

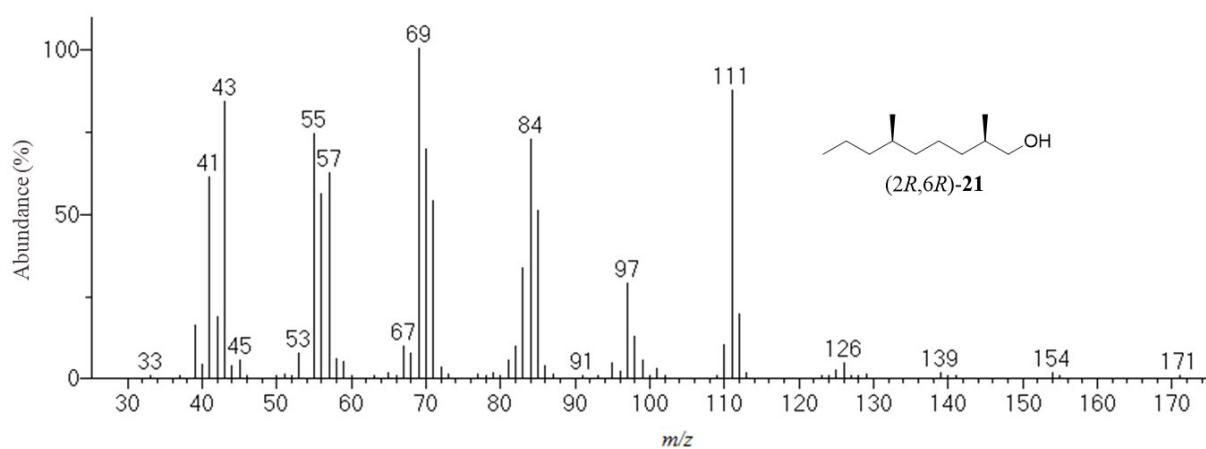

Infrared spectrum of compound (2*R*,6*R*)-**21**

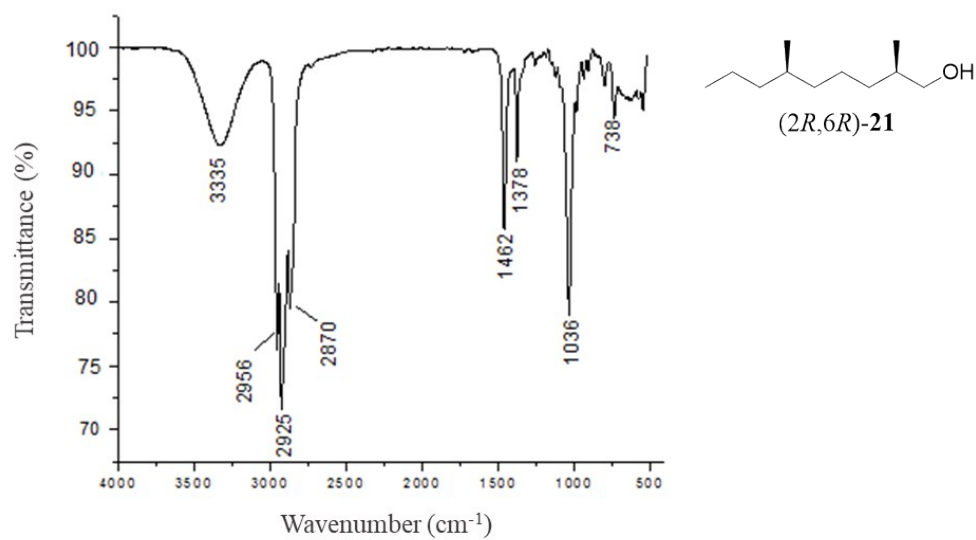

$^1\text{H}$  NMR (300 MHz,  $\text{CDCl}_3$ ) of compound (2*R*,6*S*)-**22**

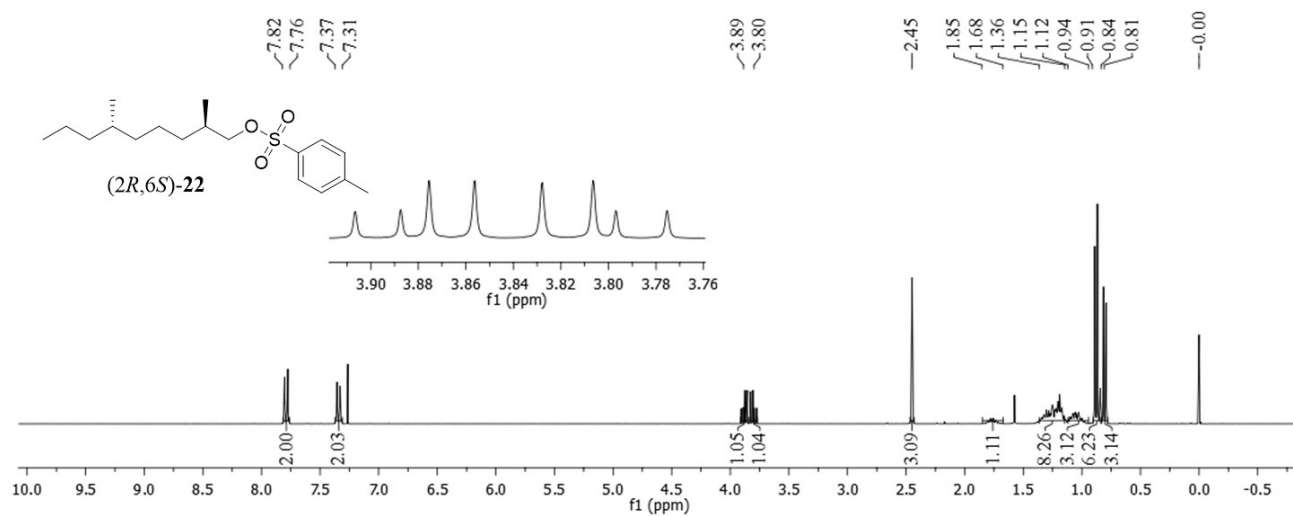

$^{13}\text{C}$  NMR (75 MHz,  $\text{CDCl}_3$ ) and DEPT 135 (superior) of compound (2*R*,6*S*)-**22**

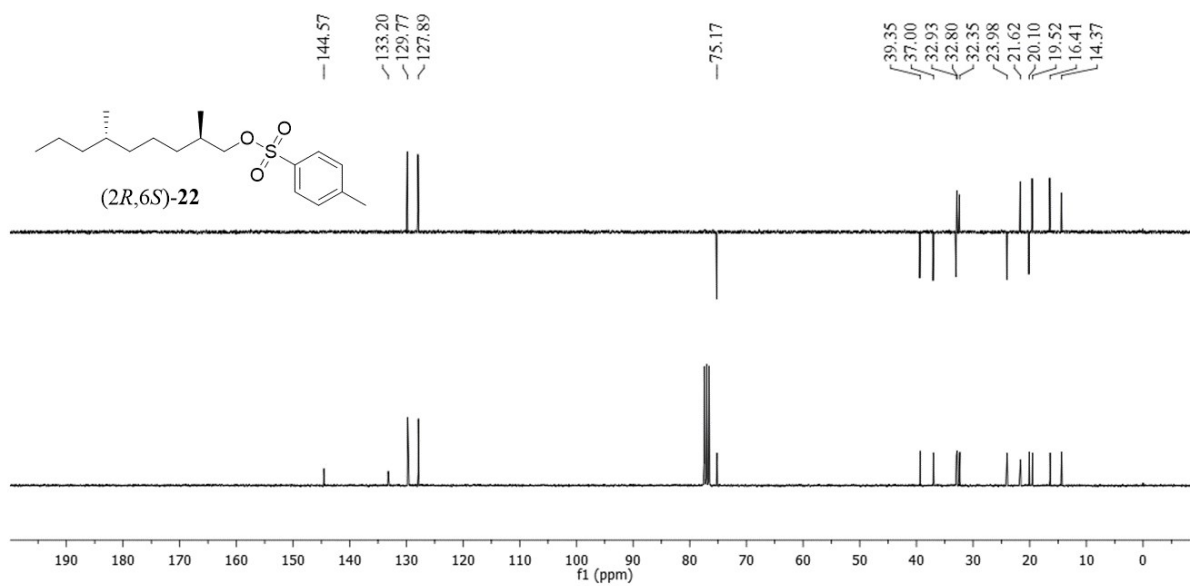



Mass spectrum (EI, 70 eV) of compound (2*R*,6*S*)-**22**

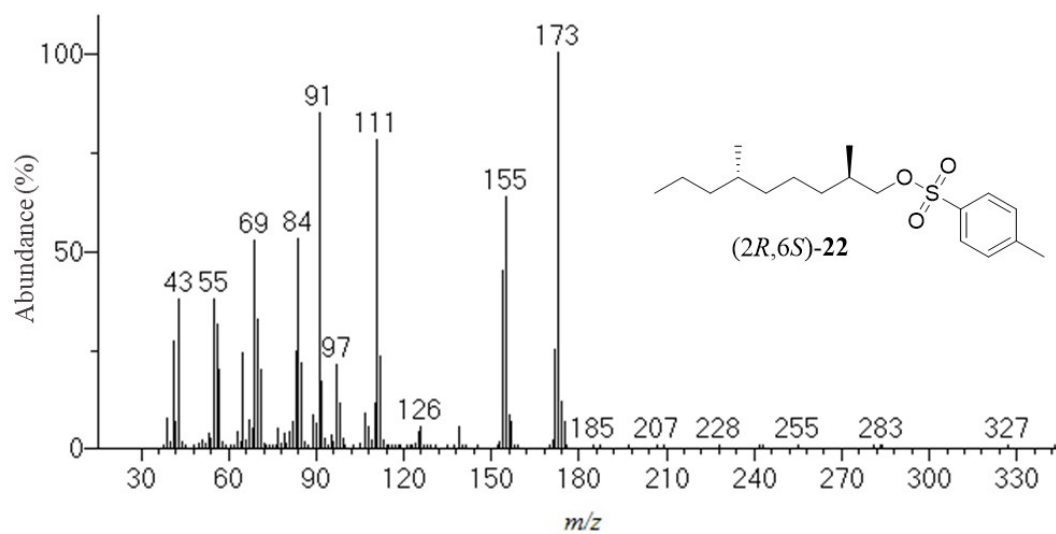

Supplement: d0ob00862a1.pdf [file d0ob00862a1.pdf]
